# Supplementary material for: Chemo-enzymatic cascades producing 2,5-furandicarboxylic acid precursors viad-gluconate “barbell oxidation” and dehydration
Source: Royal Society of Chemistry journal article supplement (doi:10.1039/d3gc01493b), 2023-01-01
Supplement: d3gc01493b1.pdf [file d3gc01493b1.pdf]

## Electrical Supporting information

### Chemo-enzymatic cascades producing 2,5-furandicarboxylic acid precursors via D-gluconate “barbell oxidation” and dehydration

Jiao Chen,<sup>a,b</sup> Jiali Cai,<sup>c</sup> Feng Sha,<sup>d</sup> Wenjun Sun,<sup>a</sup> Xilei Lyu,<sup>e</sup> Yonghui Chang,<sup>f</sup> Fei Cao,<sup>\* a</sup> Lili Zhao<sup>\* c</sup>, Hongli Wu<sup>a</sup> and Pingkai Ouyang<sup>a</sup>

<sup>a</sup> College of Biotechnology and Pharmaceutical Engineering, Nanjing Tech University, 30 South Puzhu Road, Nanjing, 211816 (P. R. China)

<sup>b</sup> Institute for Cell Analysis, Shenzhen Bay Laboratory, Shenzhen, 518132, China

<sup>c</sup> Institute of Advanced Synthesis, School of Chemistry and molecular Engineering, Nanjing Tech University, 30 South Puzhu Road, Nanjing, 211816 (P. R. China)

<sup>d</sup> Suzhou Cornigs Polyols Co., Ltd. 1183 Wuzhong Avenue, Suzhou, 215000 (P. R. China).

<sup>e</sup> R&D Center of Zhejiang Hengyi Petrochemical Co., Ltd. Hangzhou, 311209, Zhejiang, China

<sup>f</sup> School of Chemistry and Chemical Engineering, Hainan Normal University, 99 Longkun South Road, Haikou, 571158 (P. R. China)

\*Corresponding author Email: [csaofeiw@njtech.edu.cn](mailto:csaofeiw@njtech.edu.cn); [ias\\_llzhao@njtech.edu.cn](mailto:ias_llzhao@njtech.edu.cn); [hlwu@njtech.edu.cn](mailto:hlwu@njtech.edu.cn)

#### Table of contents

|                                                                                                                                                |    |
|------------------------------------------------------------------------------------------------------------------------------------------------|----|
| Table. S1 Ga5DH amino acids sequence .....                                                                                                     | 3  |
| Fig. S1 Multiple sequence alignment of Ga5DH to known.....                                                                                     | 3  |
| Fig. S2 Results of clone, and purification of Ga5DH.....                                                                                       | 4  |
| Table. S2 Kinetic parameters of Ga5DH with cofactor cofactors NADP <sup>+</sup> and NAD <sup>+</sup> . .....                                   | 4  |
| Fig. S3 HRMS results of bio-oxidation product. ....                                                                                            | 5  |
| Fig. S4 Influences of pH, temperature and metal ions on the Ga5DH, and Michaelis-Menton curve fit of Ga5DH with GA and NADP <sup>+</sup> ..... | 6  |
| Table. S3 Distribution coefficients of COBE and (S)-CHBE and the tolerances of Ga5DH/PsCR/BmGDH in different solvents .....                    | 7  |
| Fig. S5 Docking results between GA and Ga5DH.....                                                                                              | 8  |
| Fig. S6 Comparison of three enzymatic cascade reactions.....                                                                                   | 8  |
| Fig. S7 Ga5DH/ PsCR enzymatic reaction optimization.....                                                                                       | 9  |
| Fig. S8 Influences of COBE and (S)-CHBE on Ga5DH. ....                                                                                         | 9  |
| Fig. S9 SDS-PAGE results and enzymatic activities of co-express strains. ....                                                                  | 10 |
| Fig. S10 Post-treatment of bio-oxidation mixtures.....                                                                                         | 11 |
| Table. S4 Precipitation of 5KGA based on different metal salts .....                                                                           | 11 |
| Fig. S11 Bio-oxidation magnification.....                                                                                                      | 12 |
| Fig. S12 Reaction curves of bio-oxidation of glucose to GA and COBE to (S)-CHBE via B21P.....                                                  | 12 |
| Fig. S13 Characterizations of FFCA and FF.....                                                                                                 | 13 |
| NMR results of FFCA.....                                                                                                                       | 13 |
| Retention time of side product and furfural at 254 nm.....                                                                                     | 14 |
| UV absorption spectrum of side product .....                                                                                                   | 14 |
| UV absorption spectrum of furfural.....                                                                                                        | 14 |

|                                                                                                                                                 |    |
|-------------------------------------------------------------------------------------------------------------------------------------------------|----|
| Fig. S14 Characterizations of Me-MMFCA and nBu-FFCA.....                                                                                        | 15 |
| Fig. S15 Appearance of HMF. ....                                                                                                                | 17 |
| Fig. S16 Appearance of five commercial solid catalysts. ....                                                                                    | 17 |
| Fig. S17 The addition volumes of H <sub>2</sub> SO <sub>4</sub> optimization during 5KGA dehydration.<br>.....                                  | 17 |
| Fig. S18 NMR analysis of monobutyl furandicarboxylate. ....                                                                                     | 18 |
| Table. S5 Sustainability evaluation of this study .....                                                                                         | 19 |
| Table. S6 Comparison of sustainability of various FDCA preparation routes.....                                                                  | 19 |
| Fig. S19 <sup>13</sup> C NMR results of 5KGA in three deuterated reagents within different<br>addition of D <sub>2</sub> SO <sub>4</sub> . .... | 20 |
| Fig. S20 HRMS result of 5KGA dehydration at 5 mins. ....                                                                                        | 21 |
| Table. S7 Comparison of FFCA and 5KGA in DMSO and n-butanol.....                                                                                | 22 |
| Fig. S21 appearances of FFCA and 5KGA in DMSO and n-butanol. ....                                                                               | 22 |
| Fig. S22 The key bond distances in angstroms Å .....                                                                                            | 22 |
| Table. S8 Coordinates and energies (in hartree) of the calculated structures .....                                                              | 23 |

**Table. S1 Ga5DH amino acids sequence**

| Table. S1 Ga5DH amino acids sequence. |                                                                   |
|---------------------------------------|-------------------------------------------------------------------|
| MSTS                                  | LFDLTG RRALITGSSQ GIGFSLAQGL QAAGADIVLN GRDPEKLSIA AEKLGGVKTL     |
| 60                                    | PFDVTDHAGV KAAIDRFEAE TGPIDILVNN AGMQHRAPLE DFPPEMFQKV LQTNLTSIFN |
| 120                                   | VGQAVAKHML GRKSGKIINI ASVQTALARP NISPYTATKG AVGNLTKGMA TEWARHGLQC |
| 180                                   | NAIAPGYFDT PLNAALVKDA DFSQWLEKRT PAGRWGQLDE LTGACIFLAS QASSFVNGHV |
| 240                                   | LYVDGGITVS L                                                      |
| 253                                   |                                                                   |

**Fig. S1 Multiple sequence alignment of Ga5DH to known.**

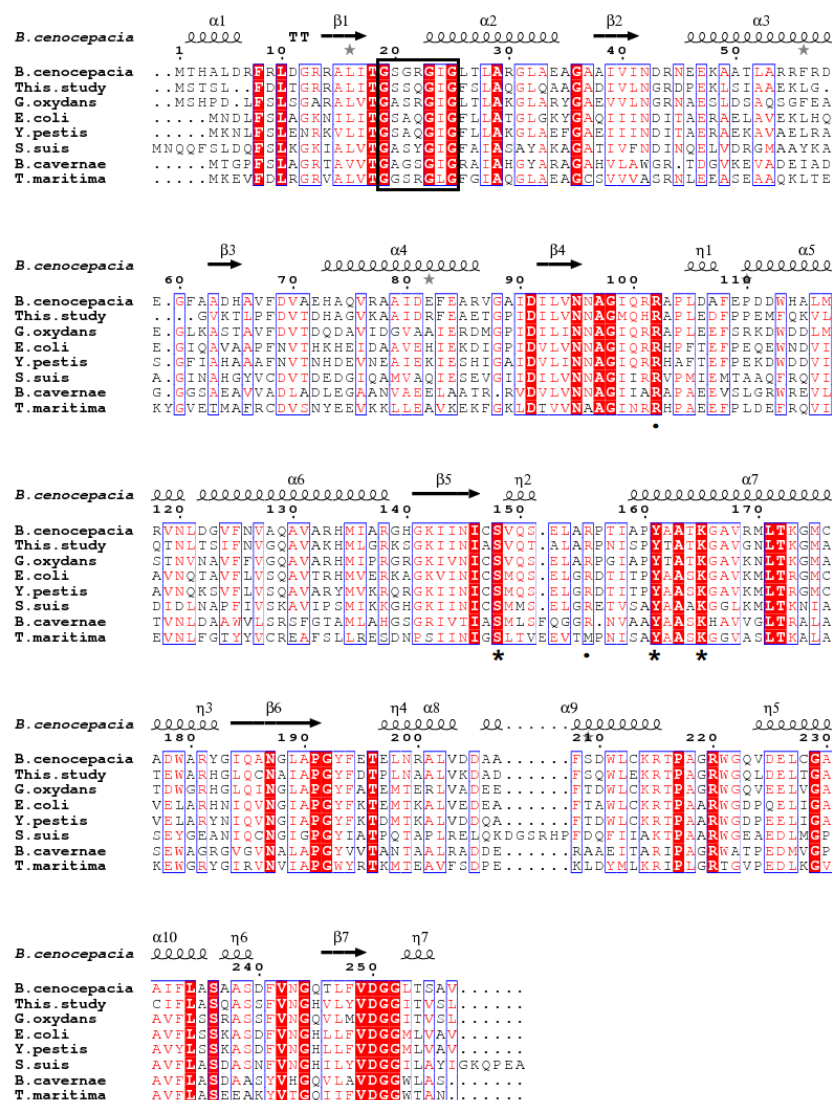

**Fig. S1** Strictly conserved residues are highlights. Sequence comparison of Ga5DH from *G. oxydans* H24 with those from *T. maritima*, *E. coli*, *G. oxydans* 621H, *Y. pestis*, *B. cavernae*, *B. cenocepacia* and *S. suis* reveals amino acid sequence identities of 38.91%, 51.37%, 58.59%, 48.63%, 37.94%, 59.92% and 41.70%, respectively.

**Fig. S2 Results of clone, and purification of Ga5DH.**

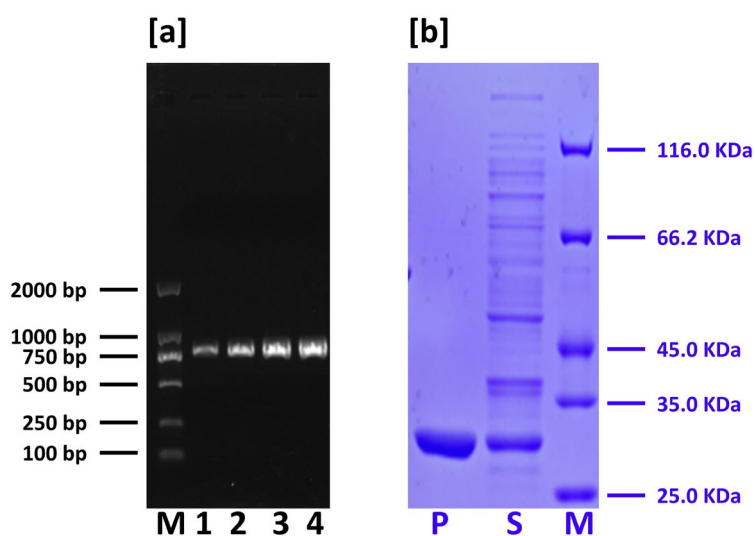

**Fig. S2 [a]:** Colony PCR of recombinant *E.coli* BL21(DE3) (pET28a-ga5dh). M: DL2000 DNA Marker, 2000, 1000, 750, 500, 250, and 100 bp (from top to bottom). **[b]:** SDS-PAGE analysis of Ga5DH. Lanes P and S: Supernatant and purified protein of Ga5DH (26.6 kDa), M: Protein marker, 116.0, 66.2, 45.0, 35.0, 25.0, 18.4 and 14.4 kDa (from top to bottom).

**Table. S2 Kinetic parameters of Ga5DH with cofactor cofactors NADP<sup>+</sup> and NAD<sup>+</sup>.**

Table. S2 Kinetic parameters of Ga5DH with cofactor cofactors NAD<sup>+</sup> and NADP<sup>+</sup>. <sup>a</sup>

| Entry | Cofactor          | $K_m$ [mM]       | $k_{cat}$ [s <sup>-1</sup> ] | $k_{cat}/K_m$ [s <sup>-1</sup> mM <sup>-1</sup> ] |
|-------|-------------------|------------------|------------------------------|---------------------------------------------------|
| 1     | NADP <sup>+</sup> | 1.1              | 18.25                        | 8.4                                               |
| 2     | NAD <sup>+</sup>  | N.D <sup>b</sup> | N.D <sup>b</sup>             | N.D <sup>b</sup>                                  |

<sup>a</sup> Reaction conditions: cofactors (0.1-1.0mmol), GA (50 mmol), pure Ga5DH, Tris-HCl buffer (100 mM, pH 8.0, 1 mL), and 30°C. <sup>b</sup> not detected.

Fig. S3 HRMS results of bio-oxidation product.

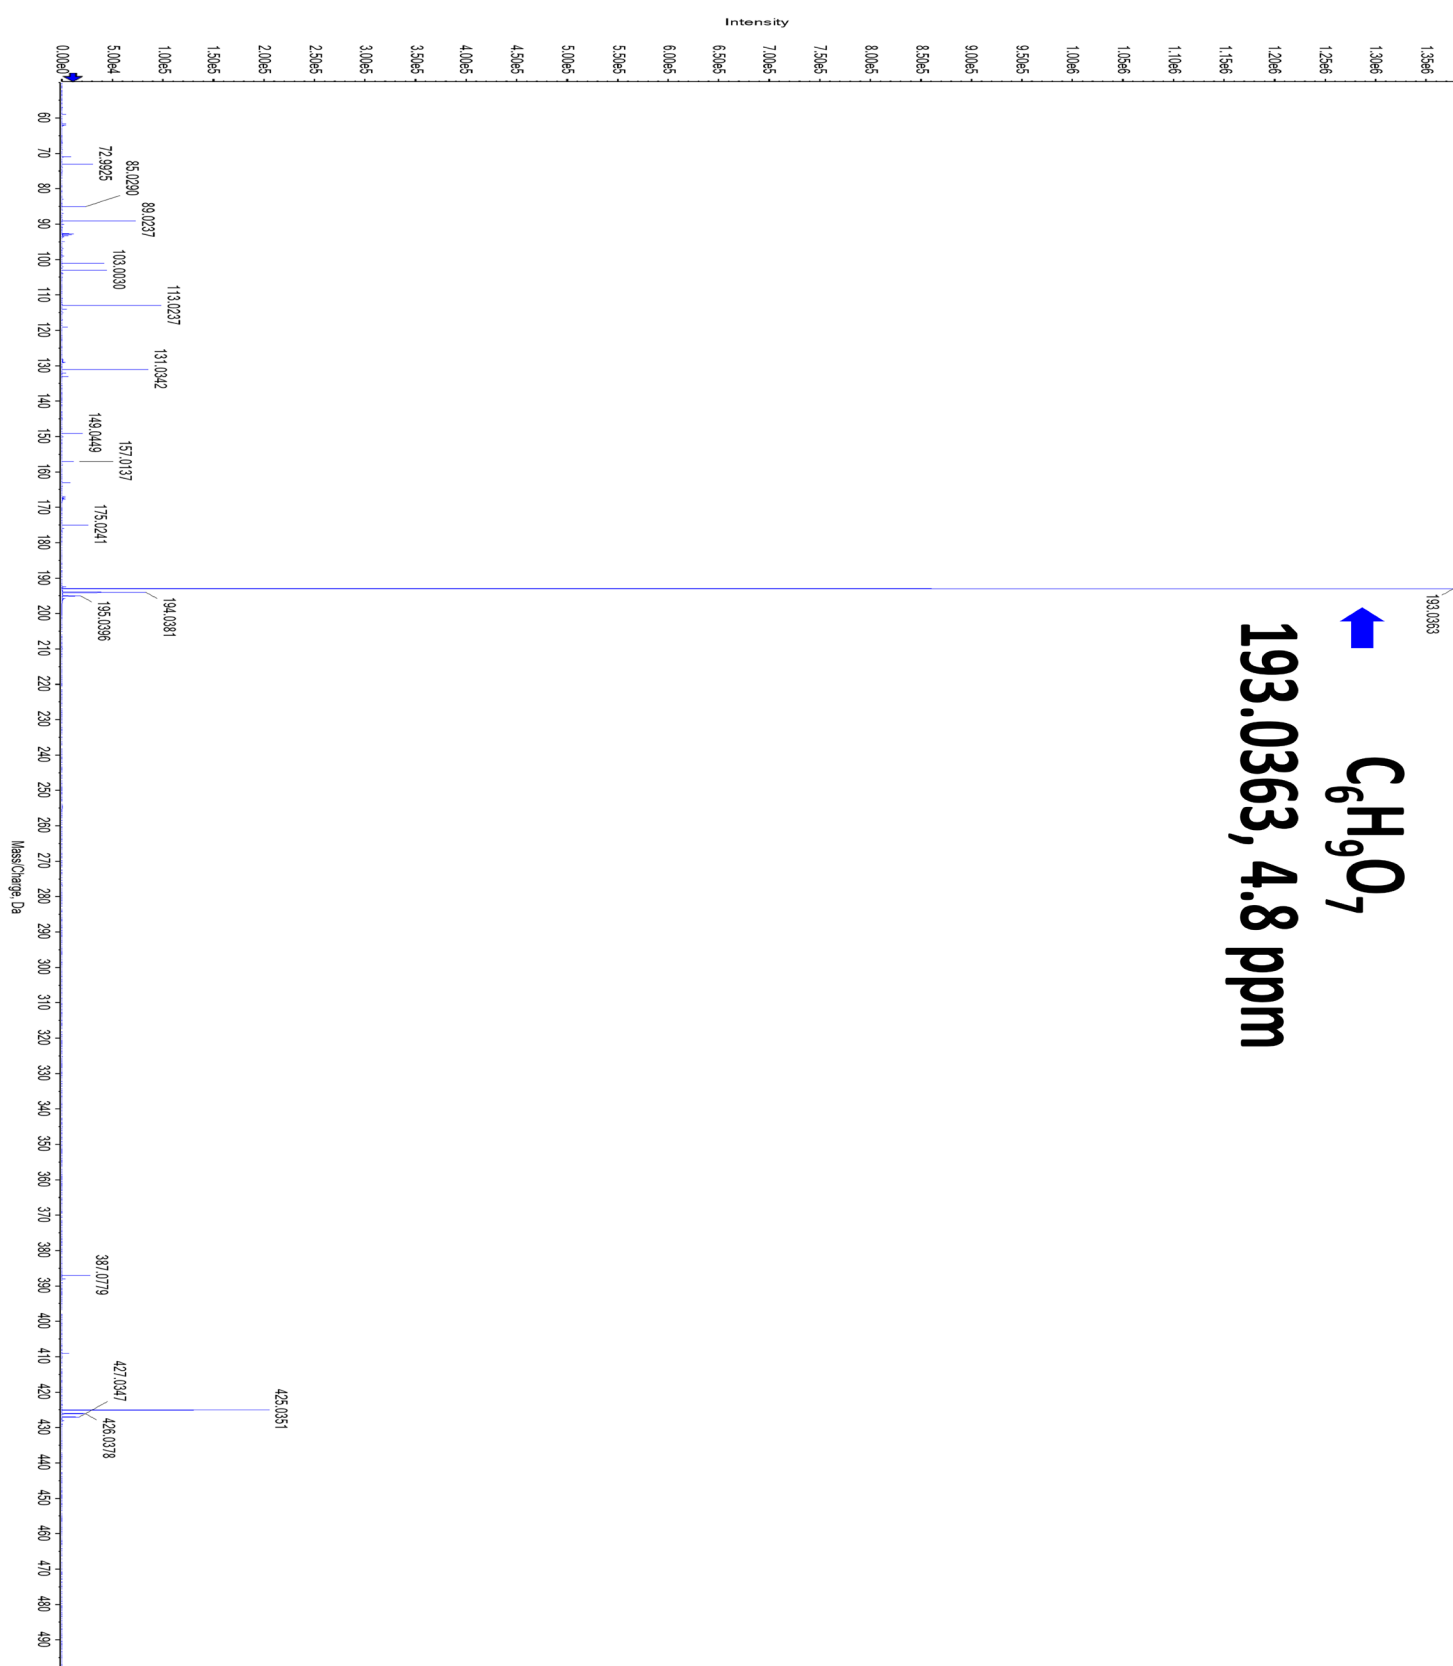

\*Negative TOF MS, range 50-500

**Fig. S4 Influences of temperature, pH and metal ions on the Ga5DH, and Michaelis-Menton curve fit of Ga5DH with GA and NADP<sup>+</sup>.**

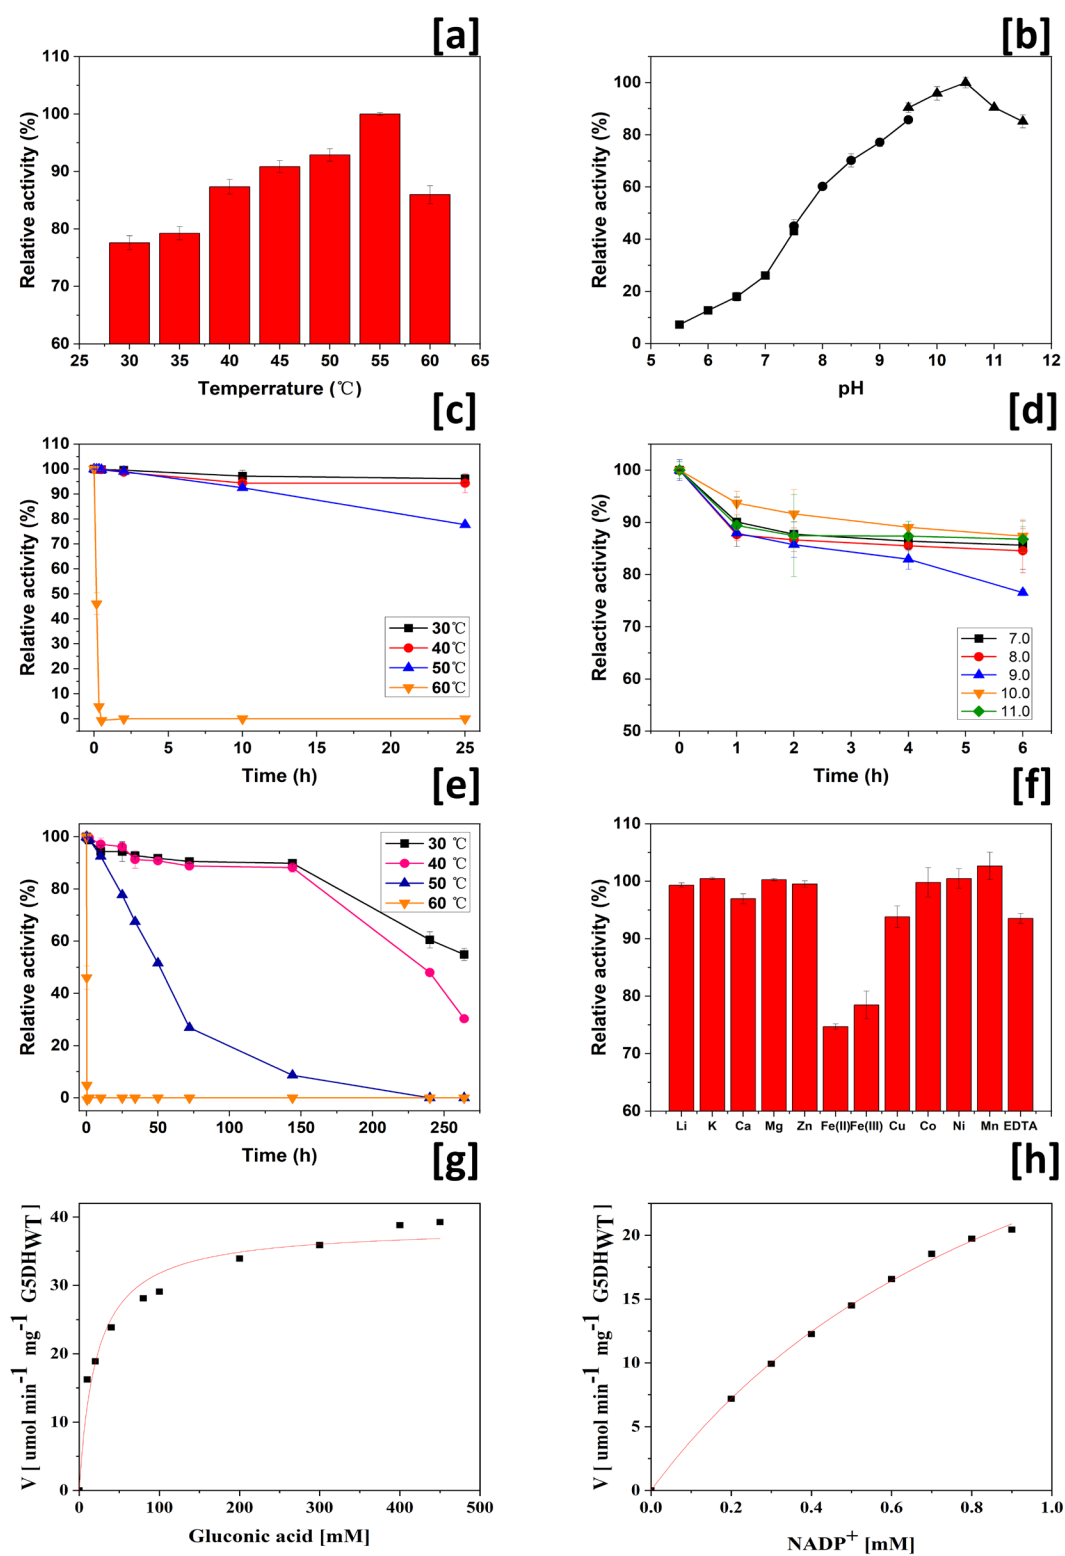

**Fig. S4 Influences of temperature (a, c, e), pH (b, d) and metal ions (f) on the Ga5DH, and Michaelis-Menton curve fit of Ga5DH with GA and NADP<sup>+</sup> (g, h).**

**Table. S3 Distribution coefficients of COBE and (S)-CHBE and the tolerances of Ga5DH/PsCR/BmGDH in different solvents**

**Table. S3 Distribution coefficients of COBE and (S)-CHBE and the tolerances of Ga5DH/PsCR/BmGDH in different solvents**

| Organic solvents  | Distribution coefficients |                   | Relative activity <sup>d</sup> (%) |          |          |
|-------------------|---------------------------|-------------------|------------------------------------|----------|----------|
|                   | COBE                      | (S)-CHBE          | PsCR                               | BmGDH    | Ga5DH    |
| Water             | -                         | -                 | 85.5±0.7                           | 48.5±0.4 | 92.4±0.7 |
| Ethyl acetate     | 16.2 <sup>a</sup>         | 23.5 <sup>a</sup> | 33.2                               | 0        | 54.4±0.3 |
| n-Butyl acetate   | 10.6 <sup>a</sup>         | 15.8 <sup>a</sup> | 72.1±0.4                           | 38.3±0.5 | 93.6±0.4 |
| Ethyl octanoate   | 6.7 <sup>b</sup>          | 9.3 <sup>b</sup>  | 65.7±0.9                           | 39.8±0.4 | 67.3±0.9 |
| 1-Octanol         | 5.3 <sup>c</sup>          | 3.8 <sup>c</sup>  | 72.7±0.4                           | 43.5±0.3 | 57.8±0.4 |
| Trichloromethane  | 17.7 <sup>a</sup>         | 7.7 <sup>a</sup>  | 5.5±0.4                            | 0        | 57.8±0.4 |
| Octane            | 0.9 <sup>c</sup>          | 0.2 <sup>c</sup>  | 77.5±0.6                           | 20.7±0.7 | 97.1±0.6 |
| n-Hexane          | 1.5 <sup>c</sup>          | 0.3 <sup>c</sup>  | 62.6±0.5                           | 13.4±0.5 | 75.0±0.5 |
| Dibutyl phthalate | 6.2 <sup>c</sup>          | 4.2 <sup>c</sup>  | 60.2±0.8                           | 41.3±0.6 | 63.6±0.8 |
| Heptane           | 1.0 <sup>a</sup>          | 0.3 <sup>a</sup>  | 75.4±0.6                           | 15.5±0.8 | 80.6±0.6 |
| Isopropyl ether   | 2.2 <sup>a</sup>          | 3.9 <sup>a</sup>  | 24.4±0.6                           | 7.2±0.5  | 67.8±0.6 |

<sup>a</sup> Data from reference 1. <sup>b</sup> 10 mL 100 mM Tris-HCl (8.0) buffer which contains 10 μmol COBE and 10 μmol (S)-CHBE, mixed with 10 mL ethyl octanoate and shook under 30°C. the concentrations of COBE and (S)-CHBE in water and ethyl octanoate were detected by GC. <sup>c</sup> Data from reference 2. <sup>d</sup> 1 mL 100 mM Tris-HCl (8.0) buffer which contains PsCR (10 U/mL), BmGDH (10 U/mL), and Ga5DH (10 U/mL), respectively, mixed with 1 mL organic solvent under 30°C for 2.5 hours, and detected the activity.

- a. Shimizu S, Kataoka M, Katoh M, Morikawa T, Miyoshi T, Yamada H. Stereoselective reduction of ethyl 4-chloro-3-oxobutanoate by a microbial aldehyde reductase in an organic solvent-water diphasic system [J]. *Appl Environ Microbiol*, 1990, 56: 2374~2377.
- c. Matsuda T, Yamanaka R, Nakamura K. Recent progress in biocatalysis for asymmetric oxidation and reduction [J]. *Tetrahedron: Asymmetry*, 2009, 20: 513~557.

**Fig. S5 Docking results between GA and Ga5DH.**

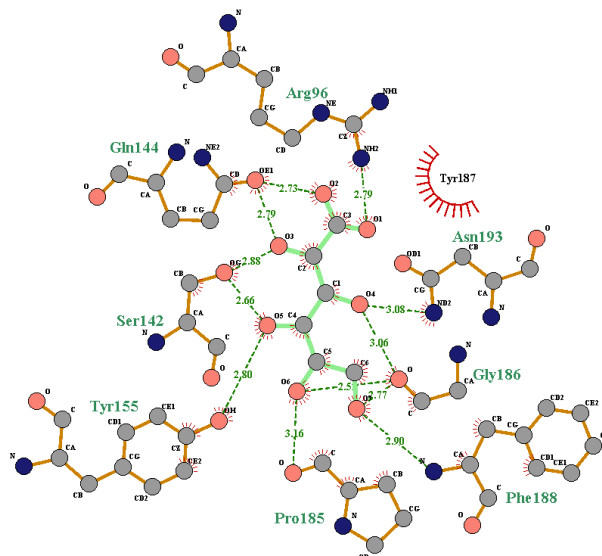

**Fig. S5** 2D representation of hydrogen bond and hydrophobic interactions by LIGPLOT program analyses. Dashed lines represent hydrogen bonds, and spiked residues form hydrophobic interactions between G5DH and gluconic acid.

**Fig. S6 Comparison of three enzymatic cascade reactions.**

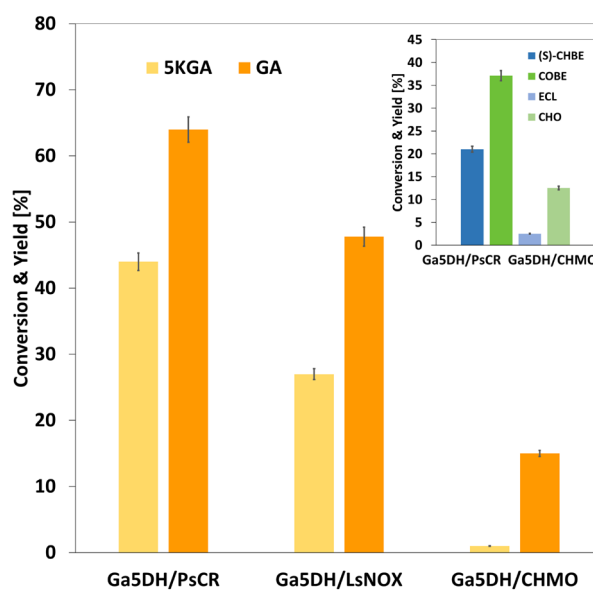

**Fig. S6** Comparison of three enzymatic cascade reactions. Conditions: GA (100 mM), co-substrate (150 mM), NADP<sup>+</sup> (0.2 mM), Ga5DH (50 U), PsCR (100 U), or LsNOX (100 U), or CHMO (100 U), and buffer (100 mM Tris-HCl, pH 8.0, 10 mL), stirring in a shake flask (50 mL) at 150 rpm and 30 °C for 1 hours.



**Fig. S7 Ga5DH/ PsCR enzymatic reaction optimization.**

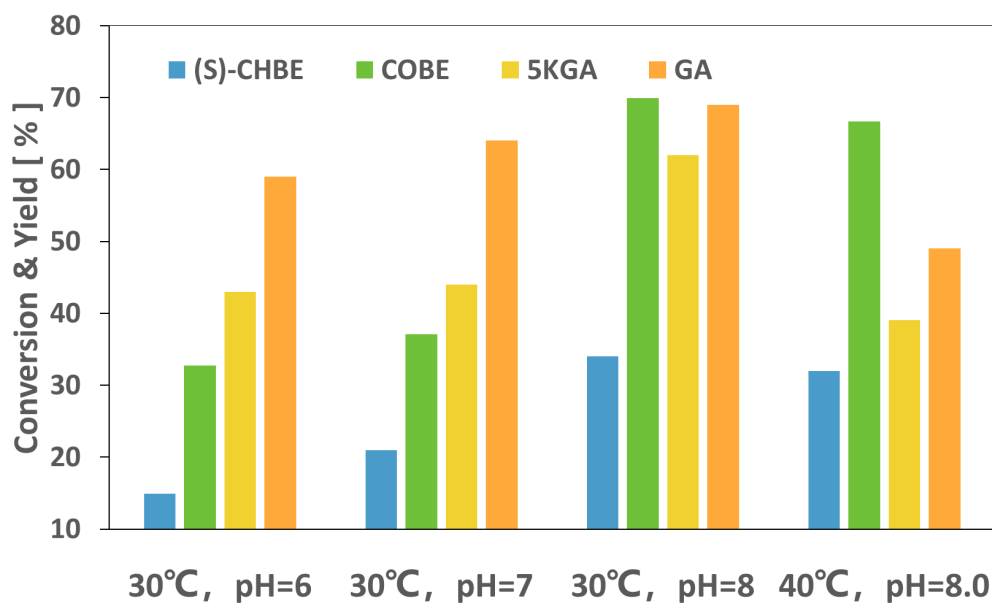

**Fig. S7 Ga5DH/ PsCR enzymatic reaction optimization.** Conditions: GA (100 mM), COBE (100 mM), NADP<sup>+</sup> (0.2 mM), Ga5DH (50 U), PsCR (100 U), and buffer (100 mM Tris-HCl, pH 8.0, 10 mL), stirring in a shake flask (50 mL) at 150 rpm and 30 °C for 1 hours.

**Fig. S8 Influences of COBE and (S)-CHBE on Ga5DH.**

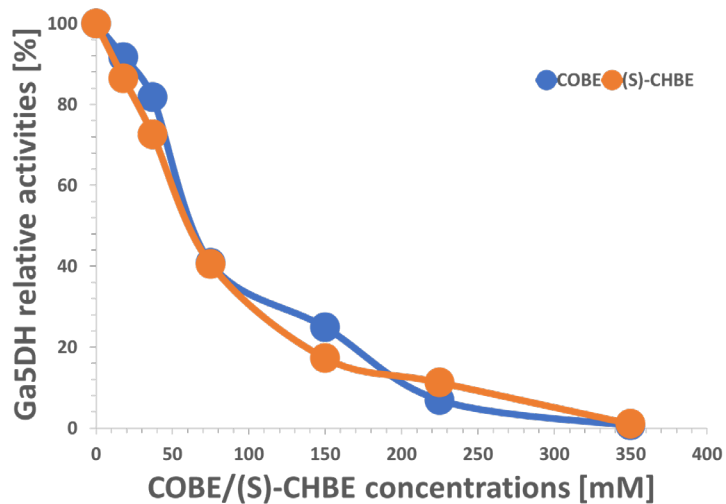

**Fig. S8 Influences of COBE and (S)-CHBE on Ga5DH.**

**Fig. S9 SDS-PAGE results and enzymatic activities of co-express strains.**

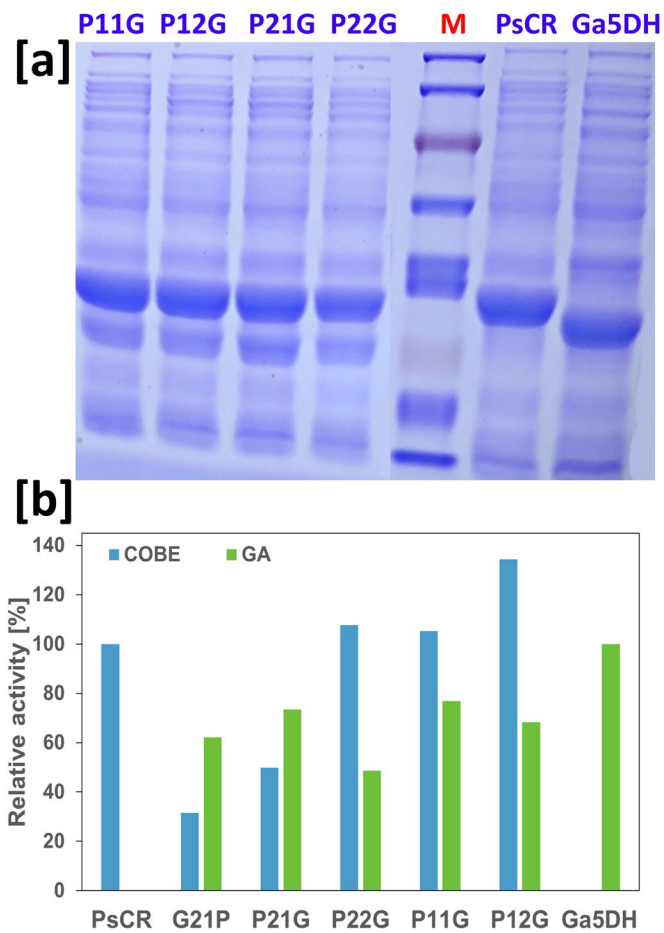

**Fig. S9 [a]:** SDS-PAGE analysis of co-expression strains. M: Protein marker, 150, 100, 70, 50, 40, 35, 25, 20, and 15 kDa (from top to bottom). SD1: GAAGGAGA SD2: TAAGGAGG AS1: ATATACAT AS2: TACAT. **[b]:** Effects of different gene order, SD regions and AS on PsCR and Ga5DH activity.

**Fig. S10 Post-treatment of bio-oxidation mixtures.**

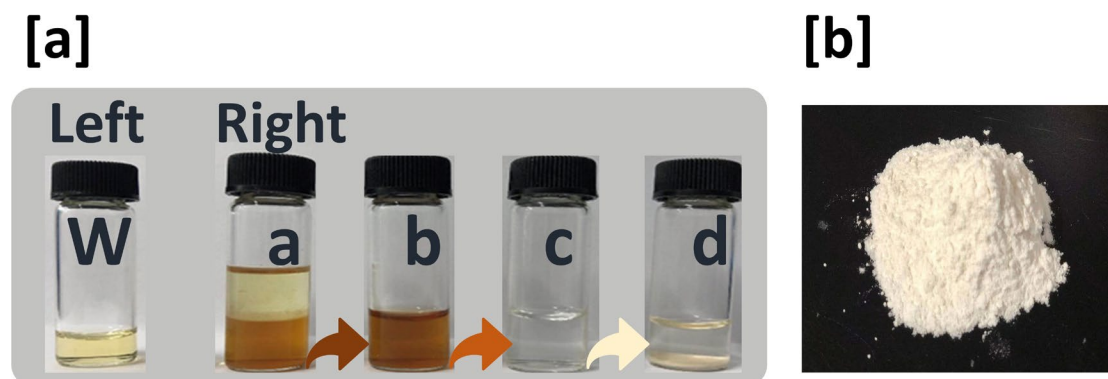

**Fig. S10 [a]:** Appearance of reaction mixtures during post-processing. **Left: W:** reaction liquid of aqueous catalytic system after boiling and centrifugal. **Right:** reaction liquid via a series of post-treatment from the aqueous-organic biphasic catalytic system. **a:** after boiling and centrifugal; **b:** aqueous phase though biphasic separation of a; **c:** decolorized from b by activated carbon; **d:** CaCl<sub>2</sub> precipitation based on c. **[b]:** Calcium 5-keto-D-gluconate from bio-oxidation.

**Table. S4 Precipitation of 5KGA based on different metal salts**

**Table. S4** Precipitation of 5KGA based on different metal salts. <sup>a</sup>

| Metal salts                          | Cation Concentration [mM] |    |    |    |     |
|--------------------------------------|---------------------------|----|----|----|-----|
|                                      | 20                        | 40 | 60 | 80 | 100 |
| MgSO <sub>4</sub>                    | -                         | -  | -  | -  | -   |
| MnSO <sub>4</sub>                    | -                         | -  | -  | -  | -   |
| CuSO <sub>4</sub>                    | -                         | -  | -  | -  | -   |
| FeCl <sub>3</sub>                    | -                         | -  | -  | -  | -   |
| ZnCl <sub>3</sub>                    | -                         | -  | -  | -  | -   |
| FeSO <sub>4</sub> •7H <sub>2</sub> O | -                         | -  | -  | -  | -   |
| NiSO <sub>4</sub> •6H <sub>2</sub> O | -                         | -  | -  | -  | -   |
| SrCl <sub>2</sub> •H <sub>2</sub> O  | -                         | +  | +  | +  | +   |
| CrCl <sub>3</sub> •6H <sub>2</sub> O | -                         | -  | -  | -  | -   |
| CoCl <sub>2</sub> •6H <sub>2</sub> O | -                         | -  | -  | -  | -   |
| CaCl <sub>2</sub>                    | +                         | +  | +  | +  | +   |
| BaCl <sub>2</sub>                    | -                         | -  | +  | +  | +   |

<sup>a</sup> condition: 10 mL 100 mM Tris-HCl (8.0) buffer (contains 0.1 M 5KGA), added metal salt (contains 20 mM metal cation) per time and shook 10mins under 30 °C for dissolving. – not precipitated. + precipitated.

**Fig. S11 Bio-oxidation magnification.**

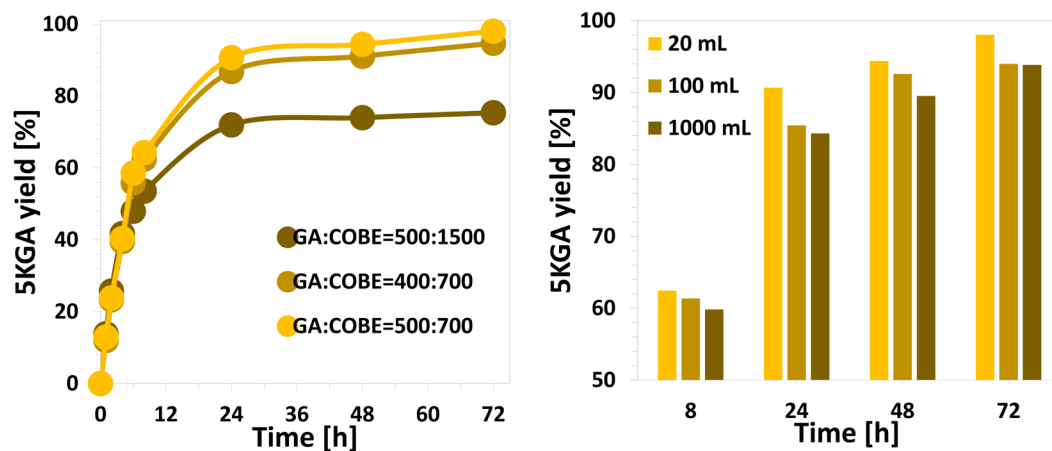

**Fig. S12 Reaction curves of bio-oxidation of glucose to GA and COBE to (S)-CHBE via B21P.**

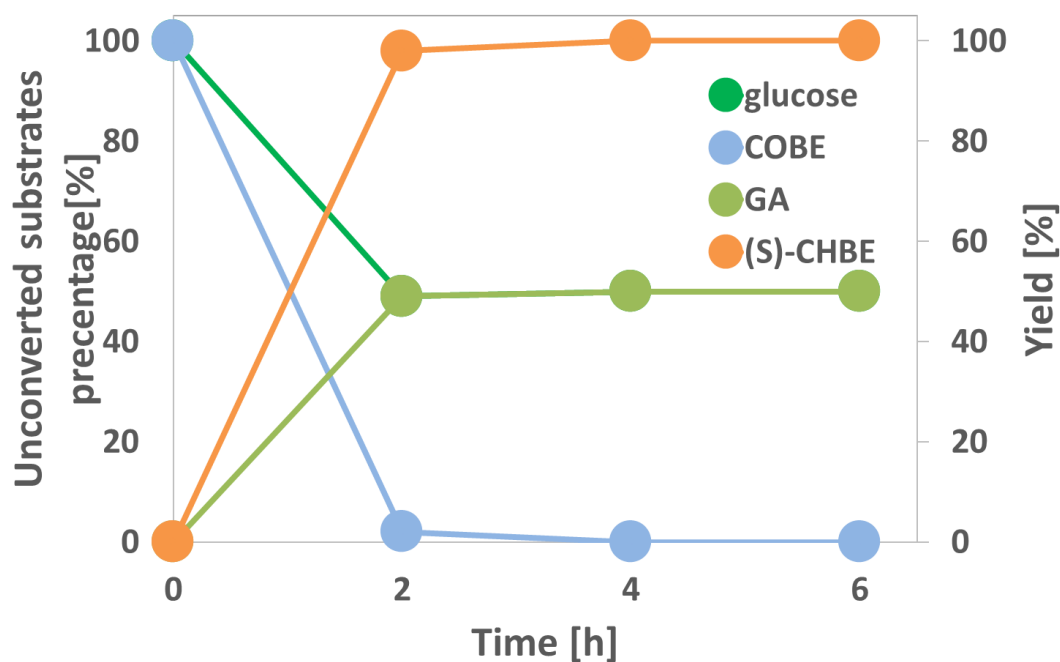

**Fig. S12 Reaction conditions:** 50 OD whole cells of *E. coli* BL21 harbouring BmGDH-SD2AS1-PsCR. Aqueous-organic biphasic catalytic system: including organic system, 10 mL n-butyl acetate, and aqueous catalytic system, stirring in a shake flask (50 mL) at 250 rpm and 30 °C for 6 hours.

**Fig. S13 Characterizations of FFCA and FF.**

NMR results of FFCA.

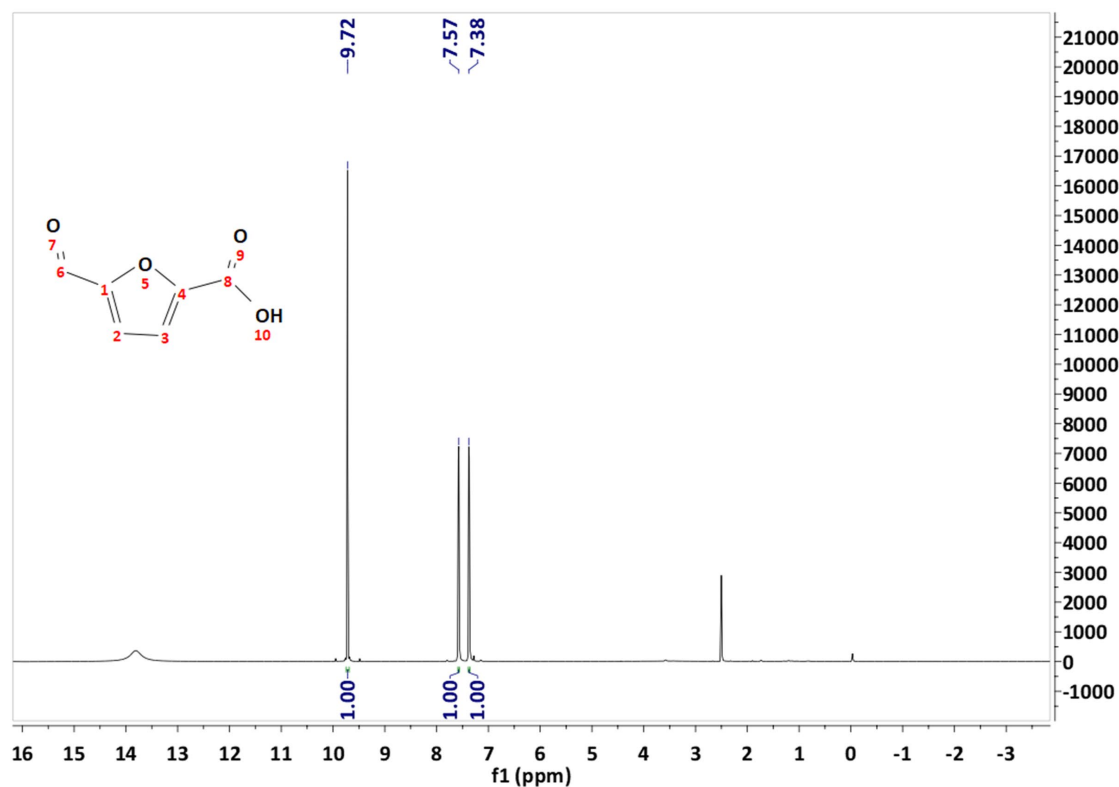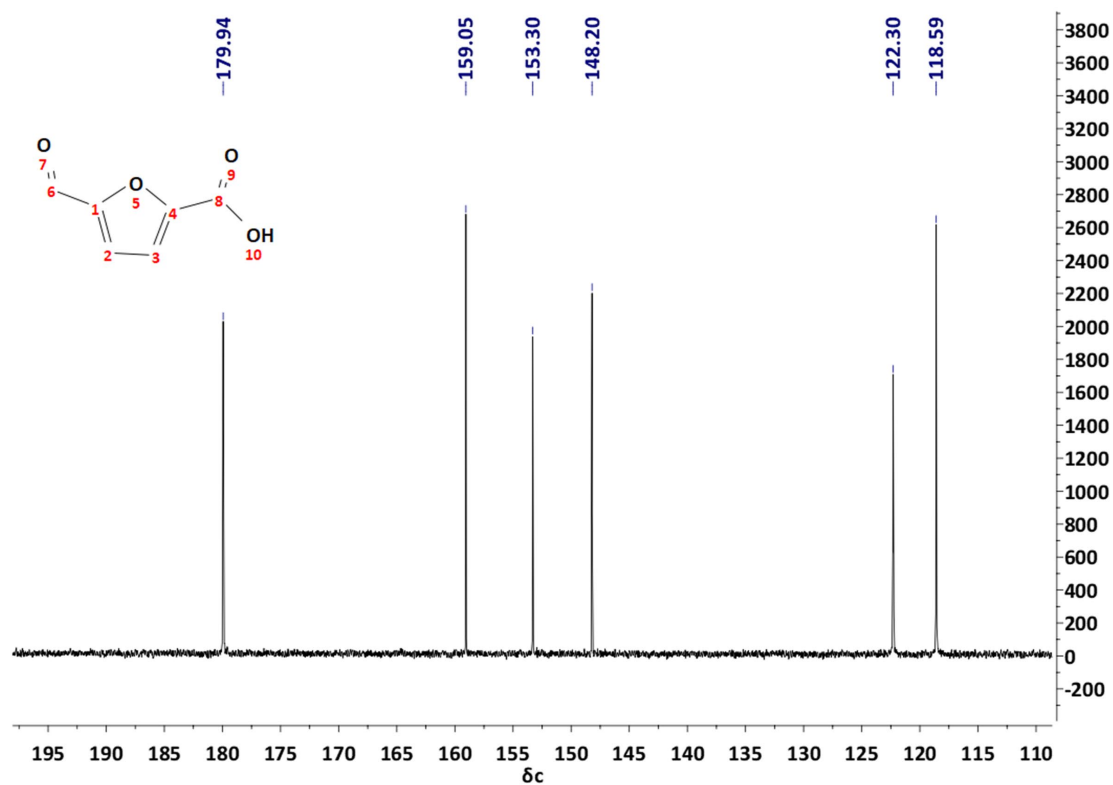

Retention time of side product and furfural at 254 nm.

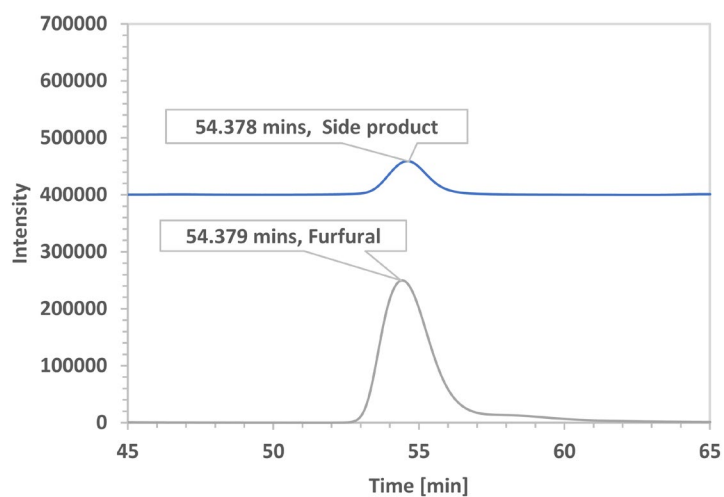

UV absorption spectrum of side product

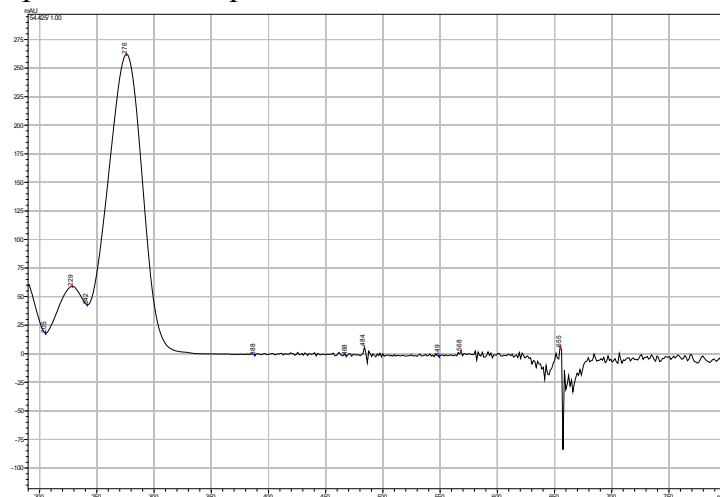

UV absorption spectrum of furfural

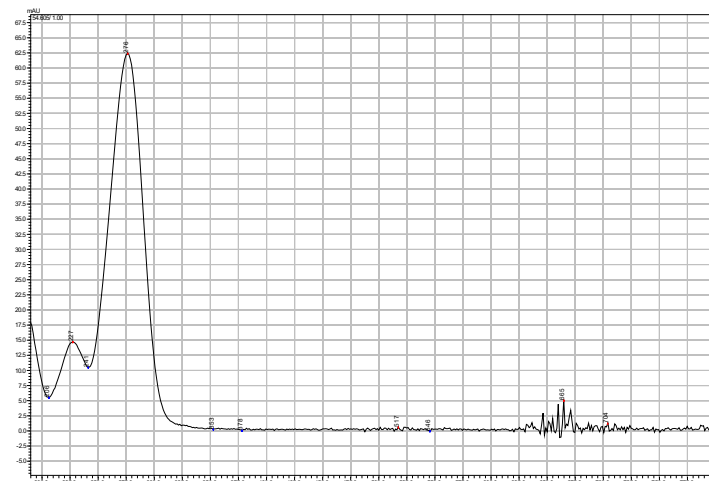

**Fig. S14 Characterizations of Me-MMFCA and nBu-FFCA.**

**NMR analysis of Me-MMFCA**

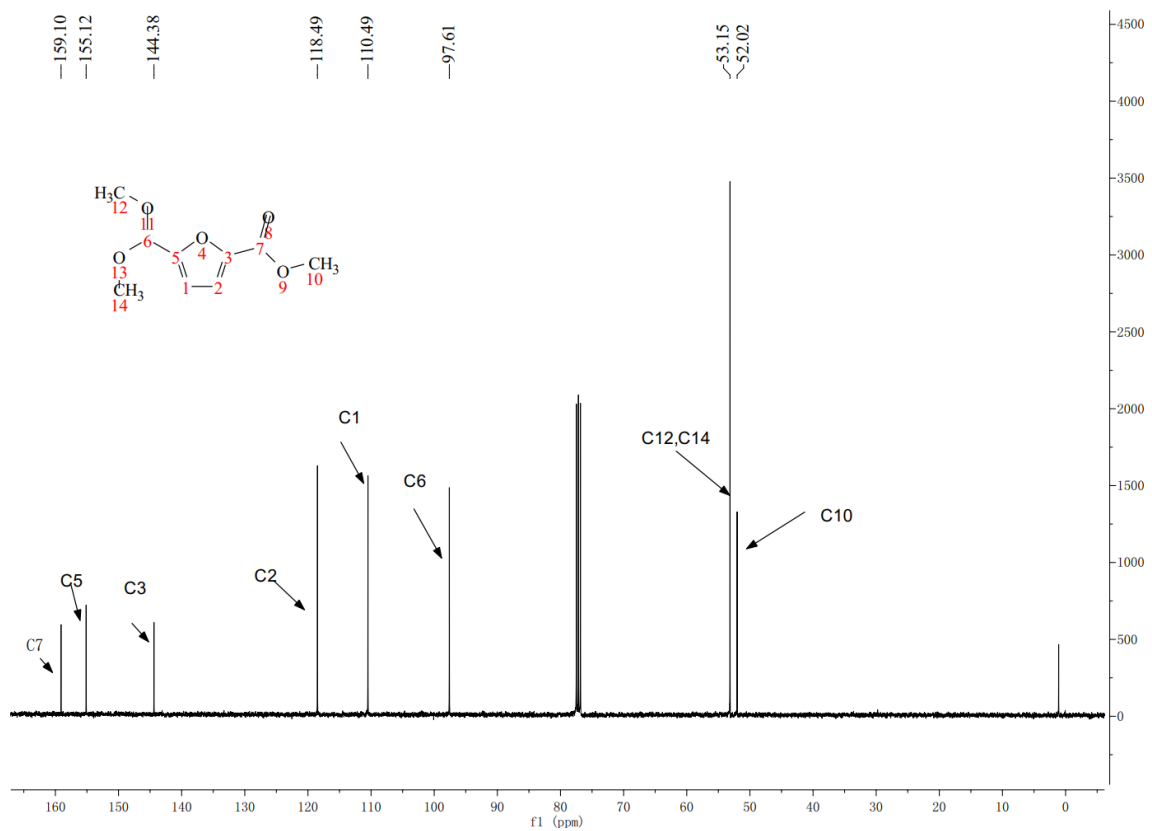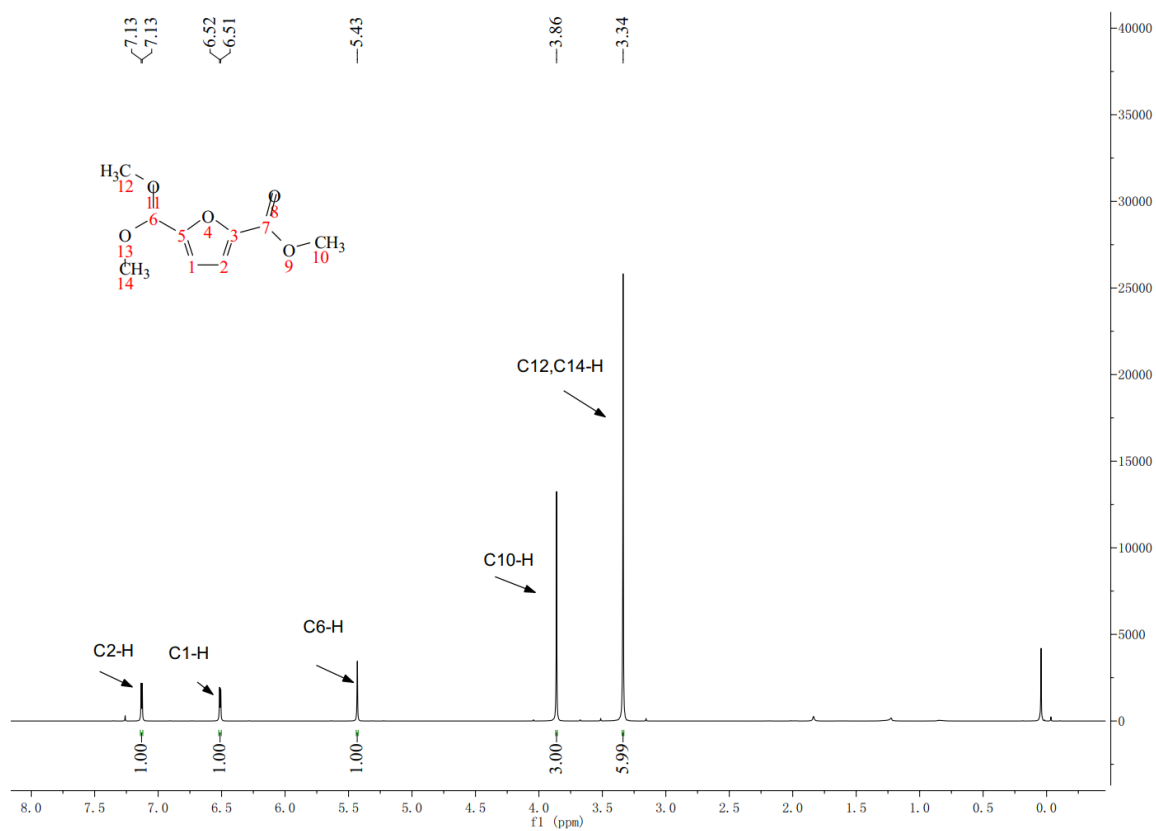

# NMR analysis of nBu-FFCA

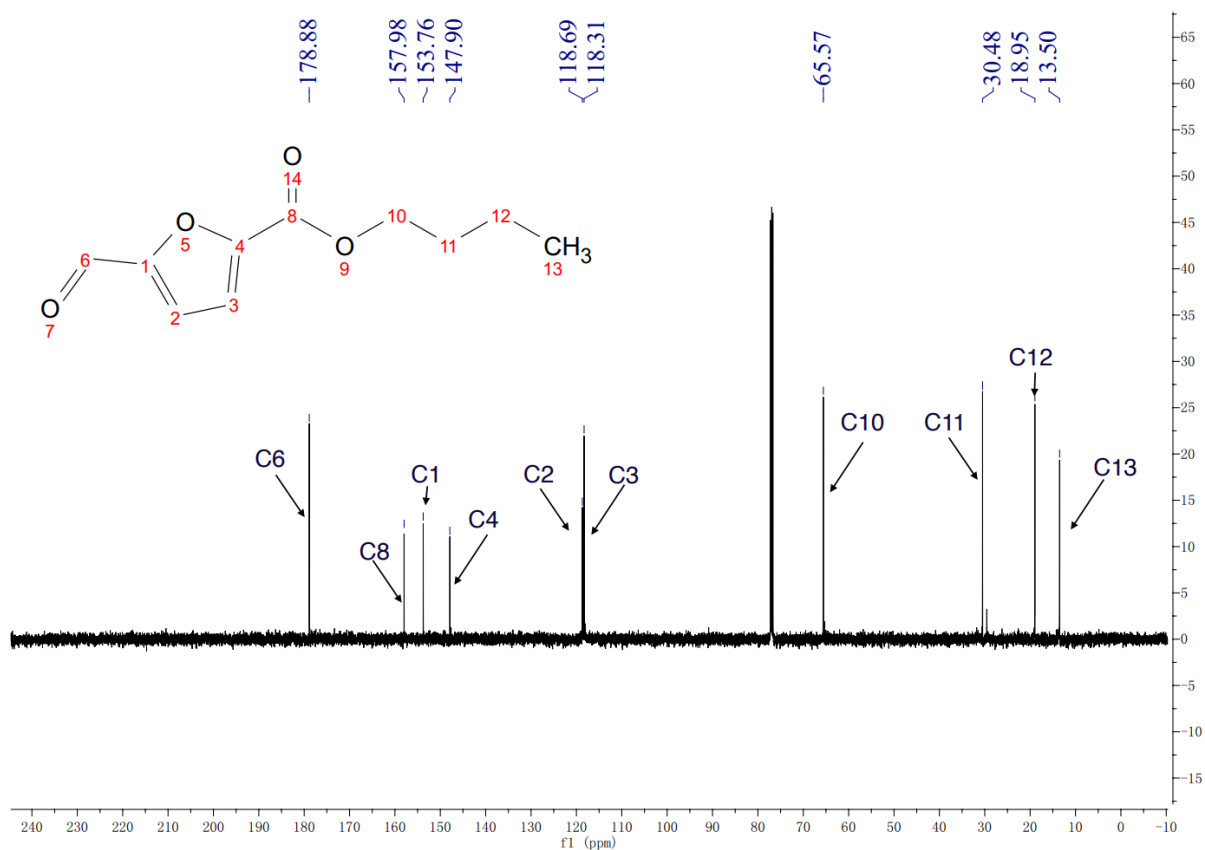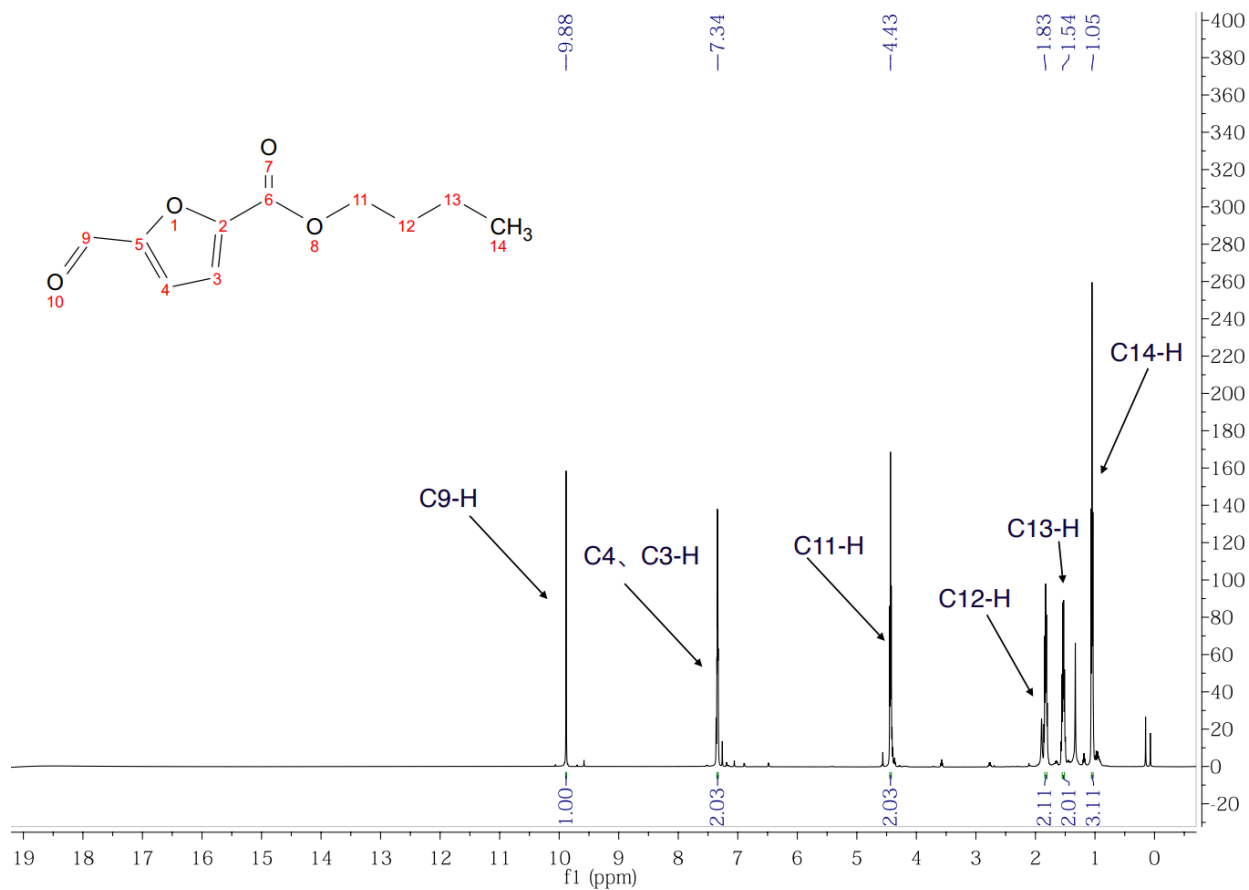



**Fig. S15 Appearance of HMF.**

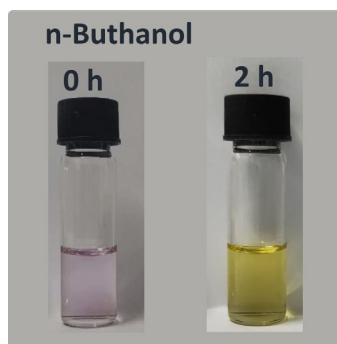

**Fig. S15** Appearance of HMF. Reaction condition: HMF 50 mg, n-butanol 5 mL, sulfuric acid 50 mM, under 110°C for 2 hours.

**Fig. S16 Appearance of five commercial solid catalysts.**

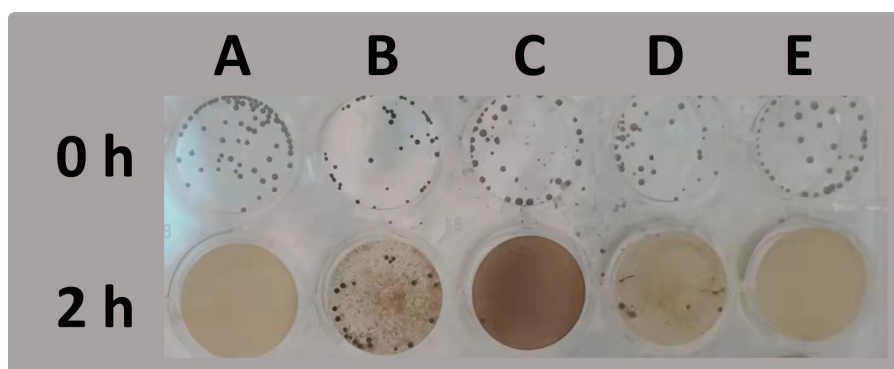

**Fig. S16** Appearance of five commercial solid acid catalysts. Reaction condition: 5KGA 50mg, n-butanol 5mL, catalyst 10 mg, under 110 °C for 2 hours. A: amberlyst-15; B: HND-590; C: HND-580; D: HND-12; E: HND-8.

**Fig. S17 The addition volumes of H<sub>2</sub>SO<sub>4</sub> optimization during 5KGA dehydration.**

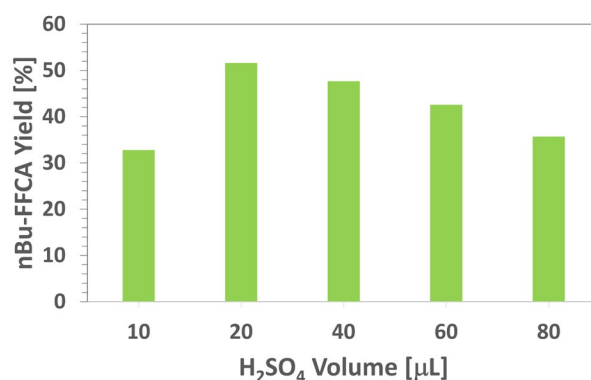

**Fig. S17** Reaction condition: 5KGA 50 mg, n-butanol 5 mL, sulfuric acid, under 110°C for 2 hours. The volumes of sulfuric acid from 10 to 80 μL, the concentration of sulfuric acid (additional volumes= 20 μL) in the system is 50 mM.

Fig. S18 NMR analysis of monobutyl furandicarboxylate.

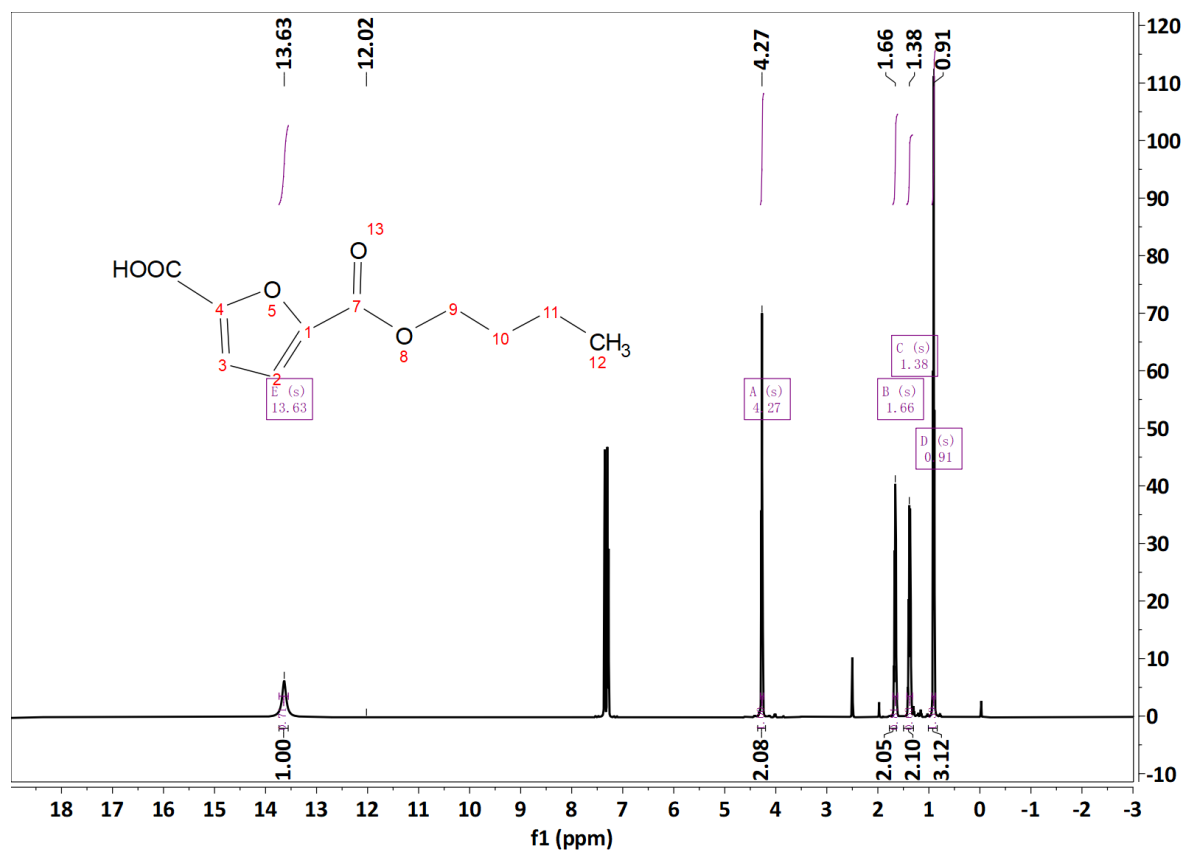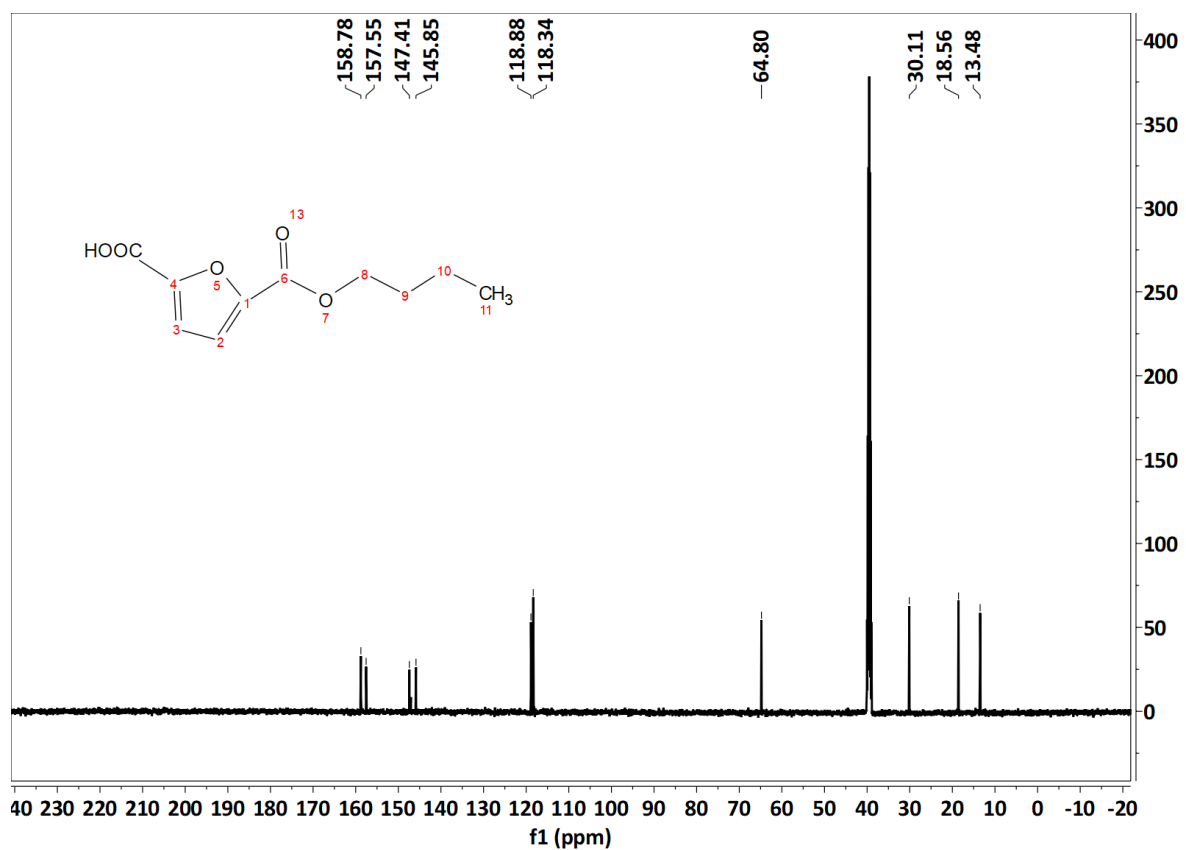

**Table. S5 Sustainability evaluation of this study**

**Table. S5 Sustainability evaluation of this study.**

| <b>Gluconic acid to 5KGA</b>                              |             |
|-----------------------------------------------------------|-------------|
| Gluconic acid molar weight (g/mol)                        | 196         |
| 5KGA molar weight (g/mol)                                 | 194         |
| 5KGA yield (% 5KGA molar yield)                           | 99.9        |
| Weight of 5KGA produced from 1 mol gluconic acid (g/mol)  | 193.8       |
| <b>5KGA to nBu-FFCA</b>                                   |             |
| 5KGA molar weight (g/mol)                                 | 194         |
| n-Butanol molar weight (g/mol)                            | 74          |
| nBu-FFCA molar weight (g/mol)                             | 196         |
| nBu-FFCA yield (% nBu-FFCA molar yield)                   | 77.9        |
| Weight of nBu-FFCA produced from 1 mol 5KGA (g/mol)       | 152.7       |
| <b>nBu-FFCA to FDCA ester</b>                             |             |
| nBu-FFCA molar weight (g/mol)                             | 196         |
| O <sub>2</sub> molar weight (g/mol)                       | 32          |
| FDCA ester molar weight (g/mol)                           | 212         |
| FDCA ester yield (% nBu-FFCA molar yield)                 | 91          |
| Weight of FDCA ester produced from 1 mol nBu-FFCA (g/mol) | 192.9       |
| <b>Gluconic acid to FDCA ester</b>                        |             |
| <b>Atom economy [%]</b>                                   | <b>70.2</b> |
| <b>Carbon efficiency [%]</b>                              | <b>77.7</b> |
| <b>Reaction mass efficiency [%]</b>                       | <b>56.6</b> |

**Table. S6 Comparison of sustainability of various FDCA preparation routes.**

**Table. S6 Comparison of sustainability of various FDCA preparation routes.**

| Substrates | Steps                                  | Yield [%] | CE <sup>a</sup> [%] | RME <sup>b</sup> [%] | SP <sup>c</sup> [¥/kg]  | Cost <sup>d</sup> [¥]           | Source            |
|------------|----------------------------------------|-----------|---------------------|----------------------|-------------------------|---------------------------------|-------------------|
| GA         | GA→5KGA                                | 99.9      |                     |                      |                         |                                 |                   |
|            | 5KGA→nBu-FFCA                          | 77.9      | 77.7                | 56.6                 | 279<br>311 <sup>e</sup> | 393,967<br>443,723 <sup>f</sup> | <i>This study</i> |
|            | nBu-FFCA →monobutyl furandicarboxylate | 91        |                     |                      |                         |                                 |                   |
| Cellulose  | Cellulose→HMF                          | 42        |                     |                      |                         |                                 |                   |
|            | HMF→FDCA                               | 93.6      | 39.3                | 34.3                 | 299                     | 760,656                         | <sup>61</sup>     |
| Glucose    | Glucose→HMF                            | 39        |                     |                      |                         |                                 |                   |
|            | HMF→FDCA                               | 80        | 31.2                | 25.0                 | 311                     | 997,396                         | <sup>57</sup>     |
| Fructose   | Fructose→HMF                           | 70.3      |                     |                      |                         |                                 |                   |
|            | HMF→FDCA                               | 95        | 66.8                | 49.1                 | 437                     | 665,087                         | <sup>58</sup>     |

<sup>a</sup> Carbon efficiency. <sup>b</sup> Reaction mass efficiency. <sup>c</sup> Substrates price, which were obtained from Aladdin ([https://www.aladdin-e.com/zh\\_cn](https://www.aladdin-e.com/zh_cn)). <sup>d</sup> The cost of raw materials required to produce one ton of FDCA (calculated based on the starting raw materials). <sup>e</sup> Price of glucose. <sup>f</sup> Calculated from glucose, the yield of GA was 98.97 % based on the reference (10.1016/j.ijbiomac.2017.10.074)

Fig. S19  $^{13}\text{C}$  NMR results of 5KGA in three deuterated reagents within different addition of  $\text{D}_2\text{SO}_4$ .

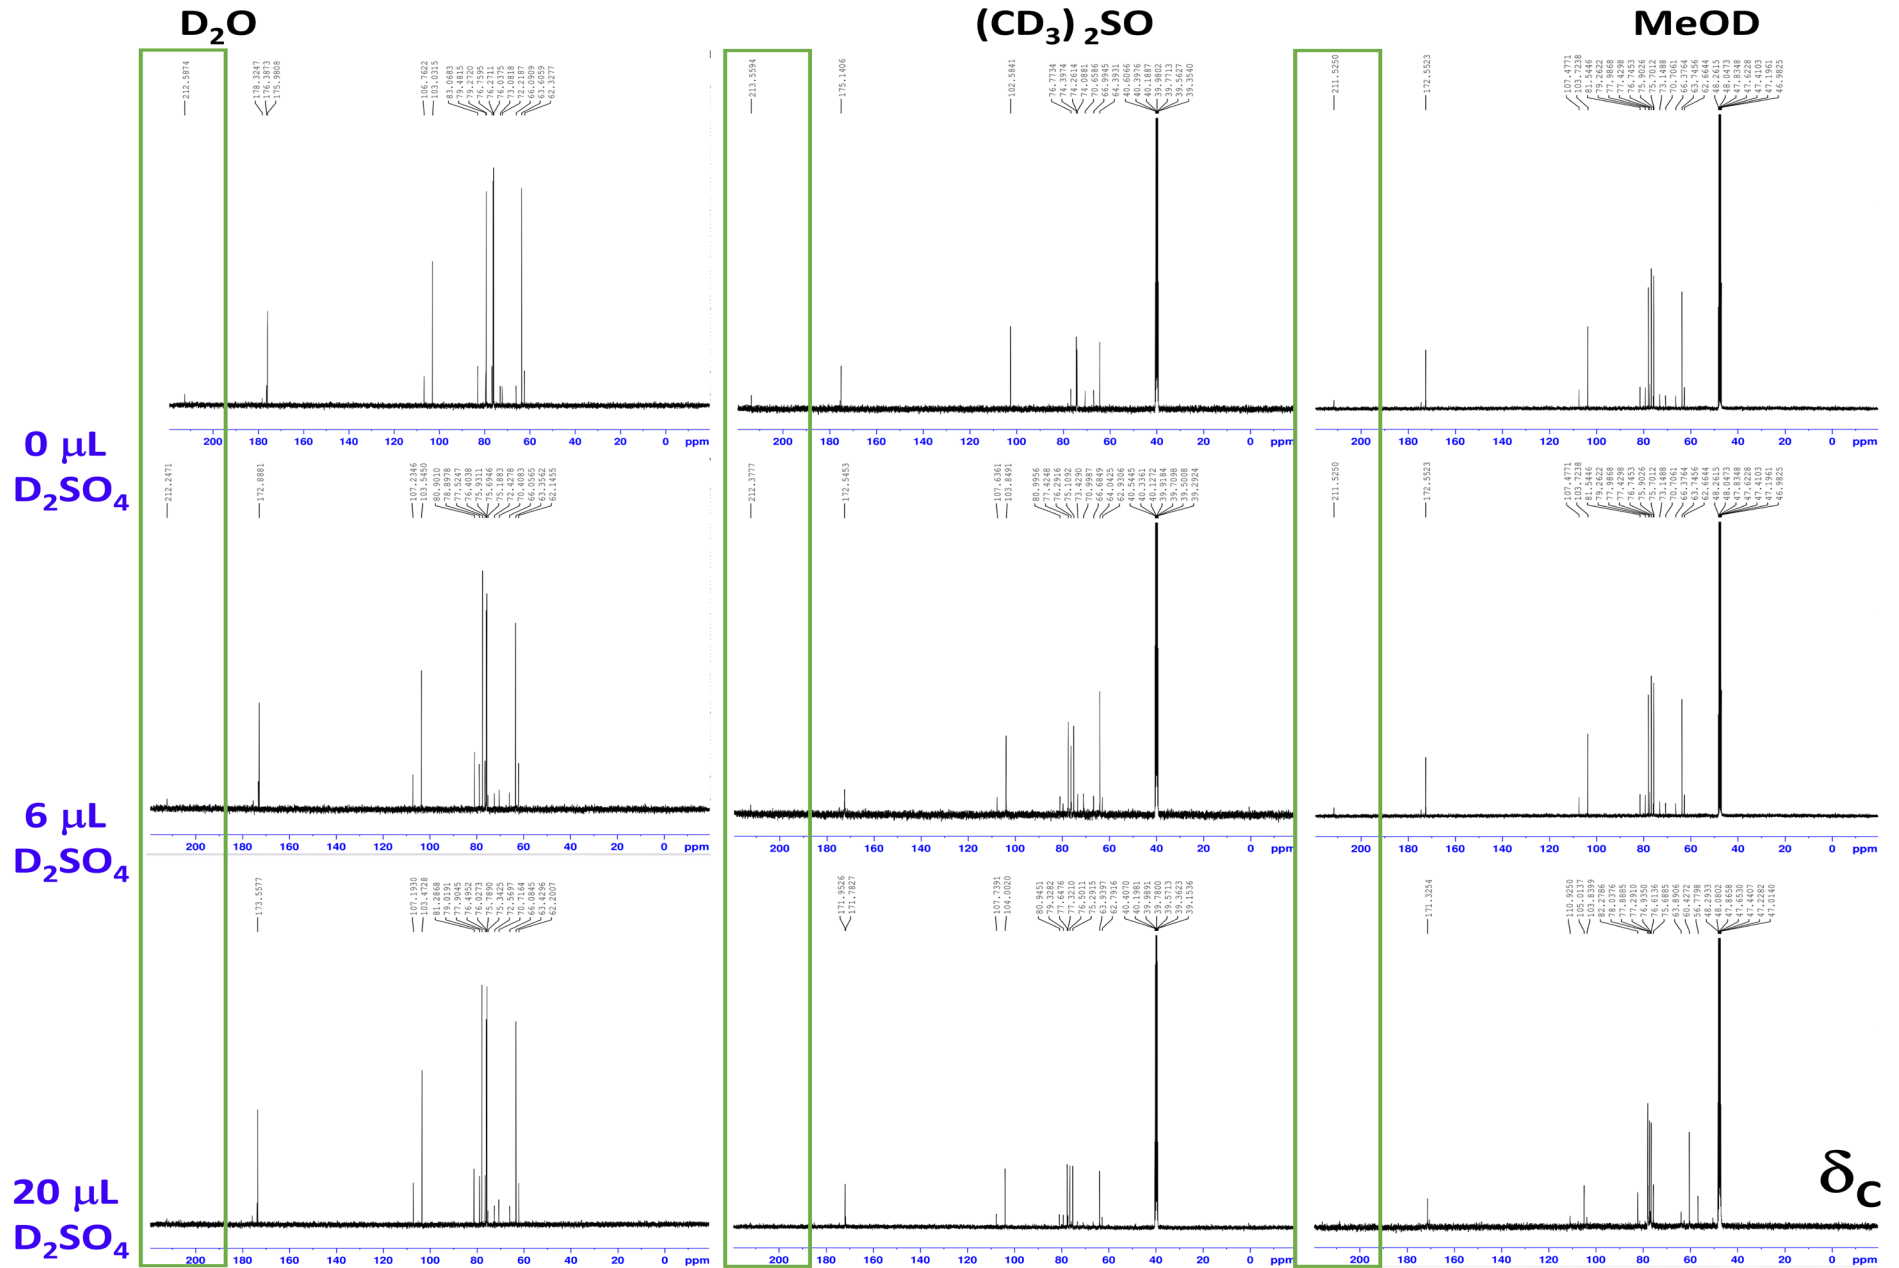

Fig. S20 HRMS result of 5KGA dehydration at 5 mins.

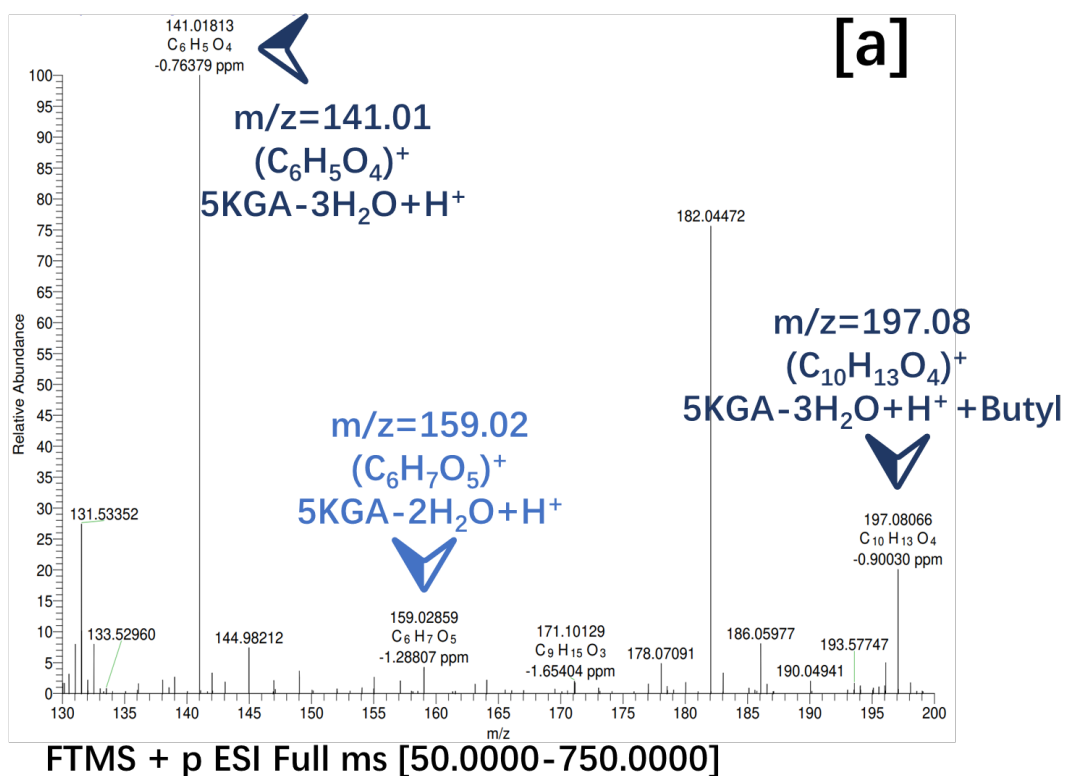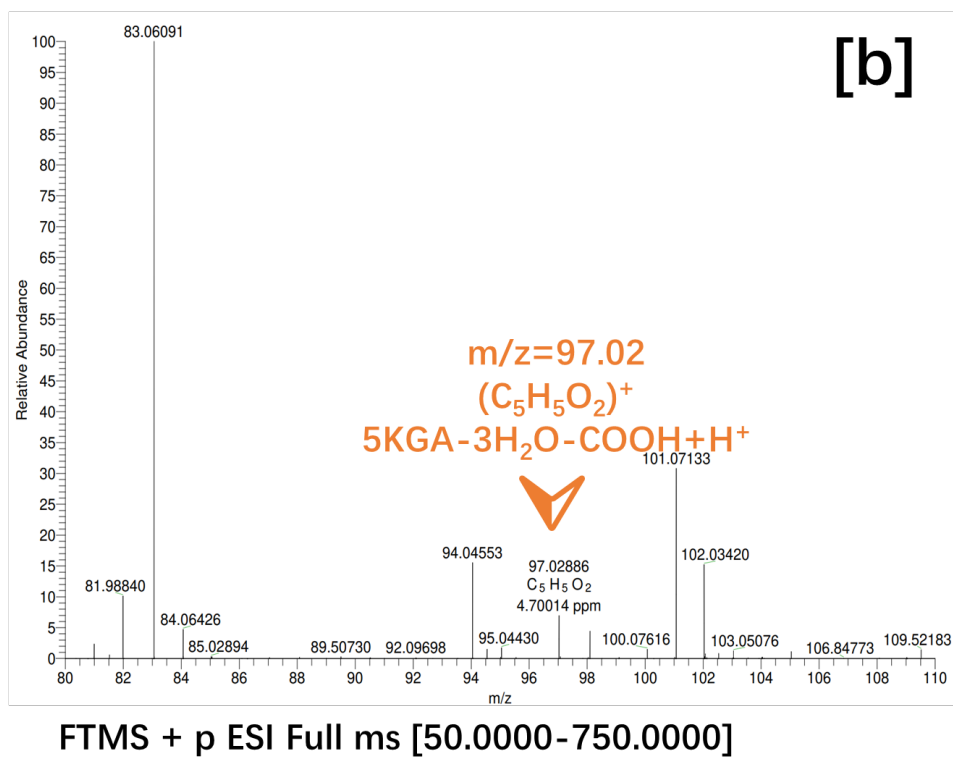

**Table. S7 Comparison of FFCA and 5KGA in DMSO and n-butanol.**

**Table. S7** Comparison of FFCA and 5KGA in DMSO and n-butanol.<sup>a</sup>

| Entry | Substrate | Solvents  | Product   | Conversion [mol %] | FF               | First product Yield <sup>b</sup> |
|-------|-----------|-----------|-----------|--------------------|------------------|----------------------------------|
|       |           |           |           |                    | Yield [mol %]    |                                  |
| 1     | 5KGA      | DMSO      | FFCA, FF  | 94.3               | 16.6             | 42.7                             |
| 4     | 5KGA      | n-Butanol | nBu-FFCA, | 100                | 5.5              | 51.6                             |
| 3     | FFCA      | DMSO      | FFCA      | 2.4                | N.D <sup>c</sup> | 98.0                             |
| 2     | FFCA      | n-Butanol | nBu-FFCA  | 91.3               | N.D <sup>c</sup> | 52.8                             |

<sup>a</sup>: Reaction conditons: 50 mg substrates and 50 mM H<sub>2</sub>SO<sub>4</sub> in 5ml solvents, under 110°C for 1 hour. <sup>b</sup>: calculated with the main product: <sup>c</sup>: Not detected.

**Fig. S21** appearances of FFCA and 5KGA in DMSO and n-butanol.

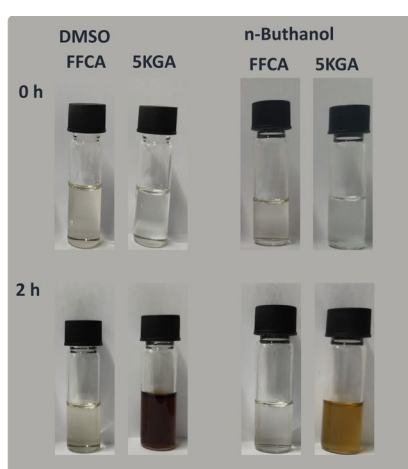

**Fig. S22** The key bond distances in angstroms Å .

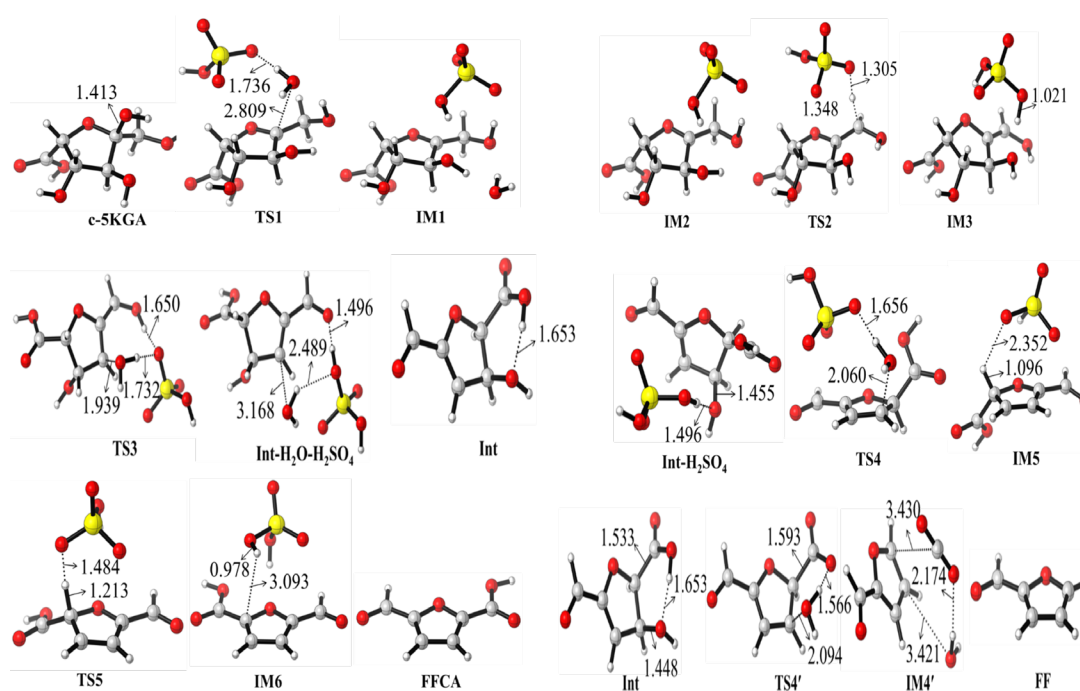

**Fig. S22** The key bond distances in angstroms Å . color code, C: gray, H: white, O: red, S: yellow.

**Table. S8 Coordinates and energies (in hartree) of the calculated structures**

|                             |           |           |           |                            |           |           |           |
|-----------------------------|-----------|-----------|-----------|----------------------------|-----------|-----------|-----------|
| <b>c-5KGA</b>               |           |           | H         | 3.547749                   | -1.952110 | -1.747377 |           |
| <b>Energy=-761.5434073</b>  |           |           | O         | 1.551486                   | 2.047453  | 1.561685  |           |
| C                           | 1.166391  | -0.149730 | 0.884686  | H                          | 1.743478  | 2.885260  | 1.106369  |
| O                           | -0.015677 | -0.951270 | 0.955610  | O                          | 2.473656  | -0.897812 | 1.910337  |
| C                           | -1.136086 | -0.283672 | 0.396451  | H                          | 2.164019  | -1.631597 | 2.462851  |
| C                           | -0.534615 | 0.843917  | -0.461870 | S                          | -2.742981 | -0.596810 | 0.090192  |
| C                           | 0.708589  | 1.229898  | 0.335333  | O                          | -1.843269 | -0.609977 | 1.268414  |
| H                           | 1.609540  | -0.068366 | 1.880121  | O                          | -4.129017 | -1.015668 | 0.374397  |
| H                           | -0.209760 | 0.431065  | -1.426108 | O                          | -2.136804 | -1.727243 | -0.961327 |
| H                           | 0.411067  | 1.866696  | 1.176054  | H                          | -2.403696 | -2.609239 | -0.644753 |
| O                           | -1.896852 | 0.245533  | 1.463033  | O                          | -2.613602 | 0.643617  | -0.725625 |
| H                           | -2.793184 | 0.373166  | 1.107739  | H                          | -1.726352 | 1.835535  | 0.172399  |
| C                           | -1.953488 | -1.325663 | -0.358189 |                            |           |           |           |
| H                           | -2.136439 | -2.165702 | 0.322317  | <b>IM1</b>                 |           |           |           |
| H                           | -1.380129 | -1.689468 | -1.220009 | <b>Energy=-1461.969471</b> |           |           |           |
| O                           | -3.172724 | -0.701224 | -0.755071 | C                          | 2.103117  | -1.129132 | 0.108354  |
| H                           | -3.841591 | -1.391679 | -0.860046 | O                          | 1.094129  | -0.869093 | -0.941309 |
| C                           | 2.222677  | -0.757685 | -0.021821 | C                          | 0.391350  | 0.169936  | -0.690659 |
| O                           | 3.407872  | -0.511969 | 0.102537  | C                          | 0.878275  | 0.917170  | 0.535952  |
| O                           | 1.719558  | -1.548185 | -0.978015 | C                          | 1.743498  | -0.135098 | 1.247620  |
| H                           | 2.459093  | -1.860950 | -1.531547 | H                          | 1.992657  | -2.178256 | 0.373367  |
| O                           | -1.463316 | 1.893736  | -0.639316 | H                          | 1.540293  | 1.699632  | 0.125900  |
| H                           | -1.067286 | 2.522298  | -1.260572 | H                          | 1.131075  | -0.651587 | 1.992333  |
| O                           | 1.637525  | 1.879566  | -0.507665 | O                          | -0.680858 | 3.714885  | 0.209136  |
| H                           | 2.376802  | 2.191059  | 0.035620  | H                          | -1.505621 | 4.072879  | 0.571159  |
|                             |           |           | C         | -0.500608                  | 0.633423  | -1.796143 |           |
|                             |           |           | H         | -1.002186                  | -0.243452 | -2.222339 |           |
|                             |           |           | H         | 0.202269                   | 1.003933  | -2.558554 |           |
|                             |           |           | O         | -1.388351                  | 1.663567  | -1.460816 |           |
|                             |           |           | H         | -2.174169                  | 1.255346  | -1.014211 |           |
|                             |           |           | C         | 3.499694                   | -0.885048 | -0.433633 |           |
|                             |           |           | O         | 4.466309                   | -1.429377 | 0.052800  |           |
|                             |           |           | O         | 3.521555                   | 0.000605  | -1.428651 |           |
|                             |           |           | H         | 4.447528                   | 0.140823  | -1.704329 |           |
|                             |           |           | O         | -0.092381                  | 1.448253  | 1.384984  |           |
|                             |           |           | H         | -0.346041                  | 2.360881  | 1.051724  |           |
|                             |           |           | O         | 2.858628                   | 0.496637  | 1.822380  |           |
|                             |           |           | H         | 3.267217                   | -0.114622 | 2.454133  |           |
|                             |           |           | S         | -2.854618                  | -1.032098 | 0.166229  |           |
|                             |           |           | O         | -3.339988                  | 0.333175  | -0.205788 |           |
|                             |           |           | O         | -3.566678                  | -1.612824 | 1.315425  |           |
|                             |           |           | O         | -1.292215                  | -0.752372 | 0.698587  |           |
|                             |           |           | H         | -1.253671                  | 0.078934  | 1.236599  |           |
|                             |           |           | O         | -2.624210                  | -1.932397 | -0.976055 |           |
|                             |           |           | H         | -0.964944                  | 3.173092  | -0.559929 |           |
|                             |           |           |           |                            |           |           |           |
| <b>TS1</b>                  |           |           |           |                            |           |           |           |
| <b>Energy=-1461.9535623</b> |           |           |           |                            |           |           |           |
| C                           | 0.939456  | -1.159738 | -0.021587 |                            |           |           |           |
| O                           | 0.559084  | -0.109687 | -1.001196 |                            |           |           |           |
| C                           | 0.951259  | 1.044709  | -0.632790 |                            |           |           |           |
| C                           | 1.743177  | 1.009550  | 0.646957  |                            |           |           |           |
| C                           | 1.368440  | -0.354598 | 1.238891  |                            |           |           |           |
| H                           | 0.047355  | -1.763283 | 0.113575  |                            |           |           |           |
| H                           | 2.790470  | 0.954708  | 0.289742  |                            |           |           |           |
| H                           | 0.494790  | -0.238773 | 1.885951  |                            |           |           |           |
| O                           | -1.123384 | 2.501954  | 0.575760  |                            |           |           |           |
| H                           | -0.797877 | 2.121429  | 1.403536  |                            |           |           |           |
| C                           | 0.782994  | 2.189226  | -1.562871 |                            |           |           |           |
| H                           | -0.138101 | 2.042147  | -2.141522 |                            |           |           |           |
| H                           | 1.625856  | 2.102697  | -2.267561 |                            |           |           |           |
| O                           | 0.860200  | 3.426396  | -0.905541 |                            |           |           |           |
| H                           | 0.057740  | 3.426739  | -0.330384 |                            |           |           |           |
| C                           | 2.068396  | -2.008681 | -0.572468 |                            |           |           |           |
| O                           | 2.248922  | -3.138614 | -0.175483 |                            |           |           |           |
| O                           | 2.822720  | -1.363841 | -1.461758 |                            |           |           |           |

**IM2**

Energy=-1461.969471

|   |           |           |           |
|---|-----------|-----------|-----------|
| C | 1.958002  | -0.919837 | -0.276128 |
| O | 0.975338  | -0.207428 | -1.126380 |
| C | 0.345761  | 0.684875  | -0.464727 |
| C | 0.896005  | 0.883476  | 0.921531  |
| C | 1.660838  | -0.421056 | 1.173374  |
| H | 1.771646  | -1.979889 | -0.432683 |
| H | 1.630082  | 1.701225  | 0.801937  |
| H | 1.002782  | -1.139086 | 1.670822  |
| C | -0.563188 | 1.619495  | -1.179738 |
| H | -1.176412 | 1.060912  | -1.896079 |
| H | 0.114934  | 2.261432  | -1.764994 |
| O | -1.304807 | 2.414810  | -0.287492 |
| H | -2.146405 | 1.926337  | -0.116923 |
| C | 3.372413  | -0.578855 | -0.708386 |
| O | 4.292621  | -1.338996 | -0.502653 |
| O | 3.465534  | 0.627588  | -1.265454 |
| H | 4.400960  | 0.803668  | -1.482703 |
| O | -0.039585 | 1.166747  | 1.927812  |
| H | -0.542510 | 1.949323  | 1.630703  |
| O | 2.817130  | -0.152020 | 1.922015  |
| H | 3.167386  | -0.991446 | 2.257595  |
| S | -2.906924 | -0.699240 | -0.125887 |
| O | -3.369759 | 0.706605  | 0.070121  |
| O | -3.641314 | -1.679992 | 0.688696  |
| O | -1.343274 | -0.685784 | 0.497211  |
| H | -1.334586 | -0.228150 | 1.366467  |
| O | -2.651395 | -1.074664 | -1.525815 |

**TS2**

Energy=-1385.4546846

|   |           |           |           |
|---|-----------|-----------|-----------|
| C | -1.473528 | -0.904152 | 0.110045  |
| O | -0.699809 | -0.150431 | 1.090942  |
| C | -0.376202 | 1.043391  | 0.628832  |
| C | -1.027057 | 1.332132  | -0.689789 |
| C | -1.443990 | -0.055621 | -1.200545 |
| H | -0.987255 | -1.872546 | 0.004259  |
| H | -1.942458 | 1.902720  | -0.467873 |
| H | -0.668283 | -0.443999 | -1.861496 |
| C | 0.574575  | 1.830156  | 1.267938  |
| H | 1.614011  | 1.058228  | 0.893503  |
| H | 0.712433  | 1.685966  | 2.340416  |
| O | 0.780863  | 3.147728  | 0.866855  |
| H | 0.675467  | 3.171077  | -0.103150 |
| C | -2.896930 | -1.116955 | 0.588656  |
| O | -3.568305 | -2.049985 | 0.198745  |
| O | -3.316762 | -0.162042 | 1.420264  |

|   |           |           |           |
|---|-----------|-----------|-----------|
| H | -4.247168 | -0.339670 | 1.654932  |
| O | -0.157171 | 2.059872  | -1.531830 |
| H | -0.696219 | 2.587141  | -2.140300 |
| O | -2.693093 | 0.042515  | -1.846309 |
| H | -2.850982 | -0.783356 | -2.327970 |
| S | 2.602891  | -0.807984 | -0.171932 |
| O | 1.556273  | -0.607037 | -1.186141 |
| O | 3.908483  | -1.268460 | -0.650376 |
| O | 2.038364  | -1.915682 | 0.895042  |
| H | 1.961051  | -2.778475 | 0.445766  |
| O | 2.731401  | 0.399391  | 0.753060  |

**IM3**

Energy=-1385.4839444

|   |           |           |           |
|---|-----------|-----------|-----------|
| C | 1.445563  | -0.947667 | -0.322194 |
| O | 0.644965  | -0.045794 | -1.105307 |
| C | 0.501047  | 1.160257  | -0.391976 |
| C | 0.782973  | 0.947994  | 1.060731  |
| C | 1.217831  | -0.525213 | 1.163854  |
| H | 1.093074  | -1.958909 | -0.521593 |
| H | 1.586079  | 1.593147  | 1.431754  |
| H | 0.389891  | -1.113912 | 1.566746  |
| C | 0.062177  | 2.260575  | -1.004112 |
| H | -1.751964 | 0.787815  | 1.097741  |
| H | -0.112456 | 2.291103  | -2.074366 |
| O | -0.224567 | 3.435447  | -0.378859 |
| H | -0.240109 | 3.305173  | 0.583940  |
| C | 2.921265  | -0.883144 | -0.679847 |
| O | 3.673271  | -1.817421 | -0.484848 |
| O | 3.291674  | 0.297641  | -1.181723 |
| H | 4.251354  | 0.270725  | -1.355512 |
| O | -0.424173 | 1.254137  | 1.793696  |
| H | -0.291807 | 1.075211  | 2.739259  |
| O | 2.369916  | -0.615326 | 1.973660  |
| H | 2.563608  | -1.552887 | 2.124834  |
| S | -2.580141 | -0.828392 | -0.127794 |
| O | -1.720544 | -1.723867 | 0.648429  |
| O | -3.961647 | -1.184848 | -0.399134 |
| O | -1.909522 | -0.579051 | -1.555269 |
| H | -0.912670 | -0.497596 | -1.467386 |
| O | -2.599109 | 0.601280  | 0.559424  |

**TS3**

Energy=-1385.4645459

|   |          |           |           |
|---|----------|-----------|-----------|
| S | 3.330258 | 0.313235  | 0.226363  |
| O | 2.542913 | 1.431291  | 0.784443  |
| O | 2.501375 | -0.572715 | -0.678662 |
| O | 4.134529 | -0.447180 | 1.193097  |



|   |           |           |           |   |           |           |           |
|---|-----------|-----------|-----------|---|-----------|-----------|-----------|
| C | -0.904109 | -1.146841 | -0.165311 | H | -3.165796 | -0.431066 | 1.734217  |
| O | -2.238743 | -1.171462 | -0.571278 | C | -4.180067 | -0.115506 | -0.109716 |
| C | -2.694979 | 0.185597  | -0.658558 | O | -4.987113 | -1.022883 | -0.044474 |
| C | -1.669925 | 1.045141  | 0.128856  | O | -4.291502 | 0.941299  | -0.915775 |
| C | -0.441254 | 0.160015  | 0.063111  | H | -5.115857 | 0.843975  | -1.428397 |
| H | -1.524037 | 2.023752  | -0.330450 |   |           |           |           |
| H | 0.422799  | 0.387806  | 0.673082  |   |           |           |           |
| O | -1.996166 | 1.152944  | 1.506525  |   |           |           |           |
| H | -2.480489 | 1.982303  | 1.632420  |   |           |           |           |
| O | 0.368902  | 0.774224  | -1.587674 |   |           |           |           |
| H | 0.589110  | 1.714353  | -1.453684 |   |           |           |           |
| C | -0.264992 | -2.343370 | 0.045100  |   |           |           |           |
| H | 1.232907  | 0.291129  | -1.481609 |   |           |           |           |
| H | -0.851672 | -3.259556 | 0.034816  |   |           |           |           |
| O | 1.014202  | -2.531707 | 0.274111  |   |           |           |           |
| H | 1.587868  | -1.743637 | 0.040804  |   |           |           |           |
| O | 4.349854  | 0.951131  | -0.887762 |   |           |           |           |
| H | 4.945293  | 1.584494  | -0.444697 |   |           |           |           |
| H | -2.712028 | 0.494401  | -1.709530 |   |           |           |           |
| C | -4.087125 | 0.368686  | -0.093010 |   |           |           |           |
| O | -4.648519 | 1.447355  | -0.141833 |   |           |           |           |
| O | -4.606366 | -0.732396 | 0.447778  |   |           |           |           |
| H | -5.495423 | -0.514049 | 0.785950  |   |           |           |           |

#### Int-H<sub>2</sub>O-H<sub>2</sub>SO<sub>4</sub>

Energy=-1385.4793752

|   |           |           |           |
|---|-----------|-----------|-----------|
| S | 3.326423  | -0.081022 | -0.412936 |
| O | 2.678823  | -1.304546 | -0.897344 |
| O | 2.575358  | 0.481926  | 0.850044  |
| O | 3.582860  | 0.985068  | -1.373633 |
| C | -1.006178 | 1.064568  | 0.393806  |
| O | -2.314838 | 1.195530  | 0.790332  |
| C | -2.912242 | -0.117880 | 0.719481  |
| C | -1.842614 | -1.076815 | 0.081948  |
| C | -0.650373 | -0.169953 | 0.006086  |
| H | -1.651152 | -1.930485 | 0.738701  |
| H | 0.309358  | -0.480055 | -0.373910 |
| O | -2.182963 | -1.521465 | -1.224977 |
| H | -2.696218 | -2.338056 | -1.133341 |
| O | 1.155795  | -2.302929 | 1.497292  |
| H | 1.592794  | -2.271392 | 0.631692  |
| C | -0.241142 | 2.307045  | 0.382384  |
| H | 1.246153  | -1.391251 | 1.809060  |
| H | -0.837647 | 3.229804  | 0.419208  |
| O | 0.989002  | 2.382241  | 0.322603  |
| H | 1.919347  | 1.242557  | 0.591216  |
| O | 4.680486  | -0.492112 | 0.354116  |
| H | 5.084662  | -1.263470 | -0.090877 |

#### Int-H<sub>2</sub>SO<sub>4</sub>

Energy=-1309.009008

|   |           |           |           |
|---|-----------|-----------|-----------|
| C | -2.275407 | 0.564523  | 0.003230  |
| O | -1.326257 | 1.184780  | -0.889196 |
| C | -0.374702 | 1.763480  | -0.086568 |
| C | -0.474862 | 1.460344  | 1.216513  |
| C | -1.572298 | 0.448725  | 1.376641  |
| H | -3.132245 | 1.237342  | 0.104619  |
| H | 0.191055  | 1.790312  | 2.000042  |
| H | -2.264409 | 0.629077  | 2.199151  |
| C | 0.627462  | 2.604911  | -0.768508 |
| H | 0.567703  | 2.604389  | -1.870940 |
| O | 1.456167  | 3.258498  | -0.158372 |
| H | 0.014737  | -1.282492 | 0.541113  |
| C | -2.789292 | -0.763765 | -0.515363 |
| O | -3.752866 | -1.306952 | -0.013003 |
| O | -2.080696 | -1.253018 | -1.532084 |
| H | -2.467041 | -2.112473 | -1.786209 |
| O | -1.035268 | -0.894767 | 1.534159  |
| H | -0.701802 | -0.998093 | 2.440826  |
| S | 2.070639  | -0.825695 | -0.007709 |
| O | 2.275345  | 0.183115  | -1.045473 |
| O | 2.250186  | -0.439227 | 1.389359  |
| O | 3.019034  | -2.089121 | -0.348416 |
| H | 3.806897  | -1.773722 | -0.832435 |
| O | 0.695540  | -1.562375 | -0.190533 |

#### Int

Energy=-608.5789117

|   |           |           |           |
|---|-----------|-----------|-----------|
| C | 0.744200  | -0.236940 | 0.718062  |
| O | -0.320305 | -1.033596 | 0.121013  |
| C | -1.430692 | -0.227632 | 0.094641  |
| C | -1.216152 | 1.046129  | 0.453421  |
| C | 0.253659  | 1.240017  | 0.686111  |
| H | 0.847929  | -0.559845 | 1.756229  |
| H | 0.496763  | 1.739503  | 1.625362  |
| C | -2.684791 | -0.874128 | -0.330218 |
| H | -2.591922 | -1.938182 | -0.613067 |
| O | -3.750731 | -0.281422 | -0.369992 |
| C | 2.021429  | -0.633245 | -0.032324 |
| O | 2.666771  | -1.606168 | 0.306728  |

|   |           |          |           |   |           |          |           |
|---|-----------|----------|-----------|---|-----------|----------|-----------|
| O | 2.347032  | 0.085161 | -1.102659 | H | 1.929586  | 1.431513 | -0.698880 |
| H | 1.766449  | 0.896401 | -1.127450 | O | 1.120028  | 2.032026 | -0.787108 |
| O | 0.792964  | 2.021420 | -0.407388 | H | 1.388397  | 2.886573 | -0.412492 |
| H | 1.424544  | 2.660232 | -0.041300 | H | -1.832117 | 1.923403 | 0.560796  |
| H | -1.955521 | 1.833527 | 0.480449  |   |           |          |           |

#### TS4

Energy=-1308.9950469

|   |           |           |           |
|---|-----------|-----------|-----------|
| C | 2.261236  | 0.732982  | 0.145911  |
| O | 1.179701  | 1.252037  | 0.955006  |
| C | 0.251840  | 1.704391  | 0.118174  |
| C | 0.545421  | 1.513939  | -1.215605 |
| C | 1.747988  | 0.796699  | -1.262836 |
| H | 3.100833  | 1.430900  | 0.249273  |
| H | -0.071836 | 1.821404  | -2.045019 |
| H | 2.422727  | 0.721084  | -2.103105 |
| C | -0.930949 | 2.396803  | 0.714537  |
| H | -0.966717 | 2.411227  | 1.813187  |
| O | -1.743901 | 2.945380  | -0.000764 |
| H | 0.441319  | -1.410205 | -1.152031 |
| C | 2.731607  | -0.646137 | 0.600736  |
| O | 3.802106  | -1.085569 | 0.247722  |
| O | 1.841593  | -1.255365 | 1.372706  |
| H | 2.178444  | -2.142502 | 1.602508  |
| O | 1.288056  | -1.177348 | -1.630232 |
| H | 1.056605  | -1.170850 | -2.573521 |
| S | -1.918075 | -0.872041 | 0.002870  |
| O | -1.585656 | -0.061367 | 1.203808  |
| O | -2.343127 | -0.068988 | -1.159931 |
| O | -3.191153 | -1.820138 | 0.432160  |
| H | -3.935600 | -1.242748 | 0.683262  |
| O | -0.895050 | -1.910857 | -0.311224 |

#### TS4'

Energy=-608.5497853

|   |           |           |           |
|---|-----------|-----------|-----------|
| C | 0.684551  | -0.325769 | 0.744628  |
| O | -0.449471 | -1.050985 | 0.199996  |
| C | -1.459052 | -0.189708 | 0.120583  |
| C | -1.150944 | 1.086534  | 0.529244  |
| C | 0.220744  | 1.078075  | 0.845731  |
| H | 0.842650  | -0.702955 | 1.764596  |
| H | 0.726036  | 1.793065  | 1.478155  |
| C | -2.754177 | -0.723735 | -0.376393 |
| H | -2.743633 | -1.783528 | -0.680208 |
| O | -3.744895 | -0.022091 | -0.432049 |
| C | 1.995770  | -0.752988 | -0.053359 |
| O | 2.085585  | -1.964556 | -0.264821 |
| O | 2.797218  | 0.182790  | -0.325340 |

#### IM4

Energy=-1308.999635

|   |           |           |           |
|---|-----------|-----------|-----------|
| C | -2.283696 | 0.846558  | -0.098520 |
| O | -1.213919 | 1.453418  | -0.871189 |
| C | -0.245908 | 1.748403  | -0.045439 |
| C | -0.539667 | 1.441697  | 1.300839  |
| C | -1.765934 | 0.848693  | 1.294441  |
| H | -3.161661 | 1.492795  | -0.212373 |
| H | 0.120650  | 1.622703  | 2.133849  |
| H | -2.345802 | 0.489597  | 2.132050  |
| C | 0.965492  | 2.450729  | -0.582546 |
| H | 1.015380  | 2.542903  | -1.675977 |
| O | 1.768868  | 2.930559  | 0.188832  |
| H | -0.443986 | -1.988129 | 0.915243  |
| C | -2.656924 | -0.552079 | -0.611589 |
| O | -3.681092 | -1.078756 | -0.247653 |
| O | -1.754972 | -1.044098 | -1.446417 |
| H | -2.022313 | -1.946877 | -1.706768 |
| O | -1.183511 | -1.755308 | 1.513199  |
| H | -0.735116 | -1.565092 | 2.349476  |
| S | 1.830359  | -0.904563 | -0.044989 |
| O | 1.325130  | 0.065057  | -1.066429 |
| O | 2.015593  | -0.297459 | 1.287297  |
| O | 3.316507  | -1.365644 | -0.574358 |
| H | 3.907035  | -0.589872 | -0.563744 |
| O | 1.099883  | -2.193897 | -0.057662 |

#### IM4'

Energy=-608.608871

|   |           |           |           |
|---|-----------|-----------|-----------|
| C | -0.410746 | -0.860869 | 1.857505  |
| O | -1.510804 | -0.844972 | 1.069084  |
| C | -1.397820 | 0.254934  | 0.244234  |
| C | -0.227925 | 0.921336  | 0.523823  |
| C | 0.409619  | 0.198106  | 1.568655  |
| H | -0.346803 | -1.673163 | 2.566552  |
| H | 1.353793  | 0.426333  | 2.039974  |
| C | -2.457148 | 0.470346  | -0.712210 |
| H | -3.268566 | -0.281120 | -0.680887 |
| O | -2.473121 | 1.407031  | -1.507058 |
| C | 1.405875  | -1.430388 | -0.995133 |
| O | 0.450927  | -2.097953 | -1.061216 |
| O | 2.374275  | -0.776258 | -0.942532 |
| H | 2.679502  | 1.289475  | -0.337742 |

|   |          |          |          |   |           |           |           |
|---|----------|----------|----------|---|-----------|-----------|-----------|
| O | 2.713264 | 2.191733 | 0.011531 | O | -2.302767 | -0.749248 | -1.468353 |
| H | 3.076545 | 2.071205 | 0.900255 | H | -1.478044 | -0.441089 | -1.887944 |
| H | 0.138075 | 1.809834 | 0.032124 | O | -3.447562 | -1.085554 | 0.653554  |

### IM5

Energy=-1232.5191675

|   |           |           |           |
|---|-----------|-----------|-----------|
| C | -1.640543 | -0.595269 | -0.283952 |
| O | -0.814709 | 0.214975  | 0.600186  |
| C | -0.304725 | 1.190306  | -0.099290 |
| C | -0.754120 | 1.193848  | -1.453357 |
| C | -1.562430 | 0.118204  | -1.586589 |
| H | -1.171660 | -1.585093 | -0.324426 |
| H | -0.465022 | 1.925513  | -2.192599 |
| H | -2.093485 | -0.217618 | -2.467836 |
| C | 0.475934  | 2.241135  | 0.633789  |
| H | 0.819343  | 1.956047  | 1.638637  |
| O | 0.642831  | 3.329133  | 0.128368  |
| C | -3.068841 | -0.746820 | 0.244229  |
| O | -3.877625 | -1.399777 | -0.373826 |
| O | -3.269522 | -0.108377 | 1.388771  |
| H | -4.195704 | -0.248348 | 1.666923  |
| S | 2.208249  | -0.798442 | -0.061083 |
| O | 1.928427  | 0.635417  | -0.441418 |
| O | 1.164721  | -1.720869 | -0.554592 |
| O | 2.089349  | -0.829175 | 1.582134  |
| H | 1.168528  | -1.042313 | 1.818254  |
| O | 3.603324  | -1.174020 | -0.315948 |

### IM6

Energy=-1232.5522236

|   |           |           |           |
|---|-----------|-----------|-----------|
| C | -1.848164 | -0.293686 | -0.055626 |
| O | -0.935009 | 0.430988  | 0.658069  |
| C | -0.966741 | 1.712293  | 0.162572  |
| C | -1.896084 | 1.797004  | -0.845405 |
| C | -2.463712 | 0.504061  | -0.985931 |
| H | 0.688372  | -0.506774 | -1.812134 |
| H | -2.132945 | 2.687213  | -1.409624 |
| H | -3.227954 | 0.187918  | -1.680479 |
| C | -0.050760 | 2.674390  | 0.757620  |
| H | 0.573563  | 2.283480  | 1.579713  |
| O | 0.017763  | 3.834739  | 0.377030  |
| C | -1.995545 | -1.722339 | 0.232493  |
| O | -2.764306 | -2.441824 | -0.379997 |
| O | -1.193221 | -2.127529 | 1.227160  |
| H | -1.315465 | -3.086364 | 1.355337  |
| S | 2.145187  | -0.496339 | -0.233550 |
| O | 2.112717  | 0.945108  | -0.453668 |
| O | 1.025377  | -1.173465 | -1.180909 |
| O | 1.572039  | -0.873269 | 1.208030  |
| H | 0.671363  | -0.495953 | 1.329157  |
| O | 3.382904  | -1.239551 | -0.358152 |

### TS5

Energy=-1232.5127886

|   |           |           |           |
|---|-----------|-----------|-----------|
| C | 1.349568  | -0.448162 | 0.304001  |
| O | 0.963498  | 0.523072  | -0.674085 |
| C | 0.864771  | 1.675682  | -0.052015 |
| C | 1.287798  | 1.617061  | 1.281443  |
| C | 1.640821  | 0.304969  | 1.501682  |
| H | 0.304498  | -1.030828 | 0.501142  |
| H | 1.306119  | 2.447647  | 1.971133  |
| H | 2.013946  | -0.141260 | 2.414139  |
| C | 0.279252  | 2.816026  | -0.811418 |
| H | -0.057595 | 2.584520  | -1.834129 |
| O | 0.191700  | 3.911270  | -0.298594 |
| C | 2.290965  | -1.518685 | -0.193048 |
| O | 2.861810  | -2.260269 | 0.574654  |
| O | 2.346746  | -1.557952 | -1.520381 |
| H | 2.933891  | -2.292137 | -1.784742 |
| S | -2.134734 | -0.660334 | 0.162289  |
| O | -1.716390 | 0.722567  | 0.469177  |
| O | -1.040300 | -1.659243 | 0.494019  |

### FFCA

Energy=-532.1331542

|   |           |           |           |
|---|-----------|-----------|-----------|
| C | 0.779982  | 0.275646  | -0.000105 |
| O | -0.199899 | -0.667381 | -0.000395 |
| C | -1.391305 | 0.006347  | -0.000049 |
| C | -1.167852 | 1.365645  | -0.000128 |
| C | 0.236618  | 1.539259  | -0.000086 |
| H | -1.930398 | 2.130989  | 0.000026  |
| H | 0.791719  | 2.465653  | -0.000004 |
| C | -2.601091 | -0.796610 | 0.000105  |
| H | -2.434524 | -1.889177 | 0.000052  |
| O | -3.723866 | -0.306843 | 0.000249  |
| C | 2.182153  | -0.148108 | 0.000074  |
| O | 3.108179  | 0.645963  | 0.000262  |
| O | 2.323661  | -1.481488 | 0.000004  |
| H | 3.277578  | -1.682549 | 0.000102  |

### FF

Energy=-343.4815855

|   |          |           |           |
|---|----------|-----------|-----------|
| C | 1.865692 | -0.542427 | -0.000026 |
|---|----------|-----------|-----------|

|   |           |           |           |
|---|-----------|-----------|-----------|
| O | 0.639068  | -1.114995 | -0.000010 |
| C | -0.281570 | -0.087721 | 0.000141  |
| C | 0.377516  | 1.119834  | -0.000050 |
| C | 1.766444  | 0.823969  | 0.000103  |
| H | 2.706478  | -1.220572 | -0.000374 |
| H | 2.589184  | 1.524342  | -0.000055 |
| C | -1.676980 | -0.454207 | 0.000004  |
| H | -1.868898 | -1.543882 | 0.000032  |
| O | -2.594167 | 0.363814  | -0.000041 |
| H | -0.092582 | 2.092865  | -0.000224 |

At the B3LYP+D3(BJ)/6-311++G(2d,p) (smd,  
solvent = 1-butanol)//B3LYP +D3(BJ)/6-  
31G(d,p) (smd, solvent = 1-butanol) level.
